1 Bayesian adaptive stimulus selection for dissociating models of  
2 psychophysical data

3 James R. H. Cooke<sup>1</sup>, Luc P. J. Selen<sup>1</sup>, Robert J. van Beers<sup>1,2</sup>, W. Pieter Medendorp<sup>1</sup>

4 (1) Radboud University, Donders Institute for Brain, Cognition and Behaviour, Nijmegen, The  
5 Netherlands.

6 (2) Department of Human Movement Sciences, Vrije Universiteit Amsterdam, Amsterdam, The  
7 Netherlands

8 Corresponding author: James Cooke

9 Donders Institute for Brain, Cognition and Behaviour

10 P.O. Box 9104, NL-6500 HE, Nijmegen

11 The Netherlands

12 Phone: +31 24 3612595

13 FAX: +31 24 361 6066

14 Email: [j.cooke@donders.ru.nl](mailto:j.cooke@donders.ru.nl)

## 15 **Abstract**

16 Comparing models facilitates testing different hypotheses regarding the computational basis of percep-  
17 tion and action. Effective model comparison requires stimuli for which models make different predictions.  
18 Typically, experiments use a predetermined set of stimuli or sample stimuli randomly. Both methods  
19 have limitations; a predetermined set may not contain stimuli that dissociate the models whereas random  
20 sampling may be inefficient. To overcome these limitations, we expanded the psi-algorithm (Kontsevich  
21 & Tyler, 1999) from estimating the parameters of a psychometric curve to distinguishing models. To  
22 test our algorithm, we applied it to two distinct problems. First, we investigated dissociating sensory  
23 noise models. We simulated ideal observers with different noise models performing a 2-afc task. Stimuli  
24 were selected randomly or using our algorithm. We found using our algorithm improved the accuracy  
25 of model comparison. We also validated the algorithm in subjects by inferring which noise model un-  
26 derlies speed perception. Our algorithm converged quickly to the model previously proposed (Stocker  
27 & Simoncelli, 2006), whereas if stimuli were selected randomly model probabilities separated slower and  
28 sometimes supported alternative models. Second, we applied our algorithm to a different problem; com-  
29 paring models of target selection under body acceleration. Previous work found target choice preference  
30 is modulated by whole body acceleration (Rincon-Gonzalez et al., 2016). However, the effect is subtle  
31 making model comparison difficult. We show that selecting stimuli adaptively could have led to stronger  
32 conclusions in model comparison. We conclude that our technique is more efficient and more reliable  
33 than current methods of stimulus selection for dissociating models.

## 34 **Data Availability**

35 All data and code will be posted on our institutional repository system following acceptance. In the  
36 meantime feel free to contact the authors if you would like any of the code.

## 37 **Introduction**

38 Within neuroscience there is a clear interest in developing computational models to explain neural  
39 systems and behavior. This is seen in many disciplines, such as working memory (Keshvari, van den Berg,  
40 & Ma, 2012, 2013), speed perception (Stocker & Simoncelli, 2006), multisensory integration (Acerbi,  
41 Dokka, Angelaki, & Ma, 2017; Kording et al., 2007), effector selection (Bakker, Weijer, van Beers,

42 Selen, & Medendorp, 2017), contrast gain tuning (DiMattina, 2016), and temporal interval reproduction  
43 (Acerbi, Wolpert, & Vijayakumar, 2012).

44 Inferring the best model out of several proposed models is important. Unfortunately, model com-  
45 parison is typically difficult. In addition to the computational problem of having to integrate over the  
46 parameter space of each model, it is also necessary to present stimuli which can dissociate the models.  
47 If different psychophysical models make similar predictions for many of the stimuli presented then it  
48 is difficult to dissociate these models. Despite the importance of appropriate stimuli selection many  
49 studies comparing models either select stimuli randomly (Keshvari et al., 2012, 2013) or use a set of  
50 constant stimuli (Acerbi et al., 2012, 2017; Bakker et al., 2017; Kording et al., 2007). Both of these  
51 approaches may select stimuli that are uninformative for model comparison, resulting in a large number  
52 of trials to accurately distinguish different models.

53 A more efficient approach is to select stimuli that optimize some criterion (often referred to as a  
54 utility function). The idea of utility-based stimulus selection has been studied extensively in statistics  
55 and machine learning, typically called active learning (Gardner et al., 2015; Kulick, Lieck, & Toussaint,  
56 2014), adaptive design optimization (Cavagnaro, Myung, Pitt, & Kujala, 2010) and optimal experiment  
57 design (DiMattina & Zhang, 2011). These types of algorithms have been applied to a wide range  
58 of problems including neuronal tuning curve estimation (Pillow & Park, 2016), testing for deficits in  
59 auditory perception (Gardner et al., 2015), and machine classification (Houlsby, Huszár, Ghahramani,  
60 & Lengyel, 2011) but are not commonly employed in psychophysics. For a more comprehensive review  
61 on the application of adaptive stimulus selection in sensory systems neuroscience see DiMattina and  
62 Zhang (2013).

63 Within psychophysics, selecting stimuli in an adaptive manner has been used extensively for estimat-  
64 ing the parameters of a specific psychophysical model. For example, Kontsevich and Tyler (1999) used  
65 an information theoretic approach to estimate the slope and threshold parameters of a one-dimensional  
66 psychometric function, selecting on each trial the stimulus which maximizes the information gain about  
67 these parameters. Additional work then improved on this by marginalizing out unwanted parameters  
68 in order to improve the estimates of desired parameters (Prins, 2013). However, many psychophysical  
69 models are not uni-dimensional and as such this approach was extended to multi-dimensional models  
70 (DiMattina, 2015; Kujala & Lukka, 2006; Lesmes, Lu, Baek, & Albright, 2010).

71 What if instead of inferring the parameters of these multidimensional models, we wish to dissociate  
72 different models? Wang and Simoncelli (2008) developed an algorithm specifically designed for gener-

73 ating stimuli on a trial-to-trial basis to compare two psychophysical models. However, in many cases  
74 there are more than two candidate models. More recent work used an information theoretic approach to  
75 derive a method for optimal stimulus selection to compare an arbitrary number of models (DiMattina,  
76 2016). However, this approach does not determine the optimal stimulus on a trial-to-trial basis and  
77 therefore may be a suboptimal approach. Recently, a general approach for determining the optimal  
78 stimulus to compare multiple models has been proposed in the field of cognitive science (Cavagnaro et  
79 al., 2010; Cavagnaro, Pitt, & Myung, 2011; Cavagnaro, Gonzalez, Myung, & Pitt, 2013). This approach,  
80 named Adaptive Design Optimization (ADO), which simulates the utility distribution of possible stim-  
81 uli, can be done on a trial-to-trial basis (Cavagnaro et al., 2013) and could be used to distinguish more  
82 than two models. This makes it a potentially powerful tool to select stimuli for comparing models of  
83 psychophysical data. However, implementing this approach requires a detailed understanding of Monte  
84 Carlo based simulation approaches such as particle filtering and simulated annealing.

85 This difficulty may prohibit widespread adoption of ADO. Therefore, we present an alternative and  
86 easier to implement algorithm for selecting stimuli on a trial-to-trial basis to dissociate multiple models of  
87 psychophysical data. The algorithm is a generalization of the classical psi-method (Kontsevich & Tyler,  
88 1999; Prins, 2013), shifting from estimating parameters of models to comparing models. In order to test  
89 our algorithm, we applied it to two very different psychophysical problems. First, we tested dissociating  
90 distinct models of sensory noise which affect speed perception. In order to do this we constructed three  
91 generative models, each with its own noise properties, that were probed by an ideal observer performing  
92 a 2-afc task. Stimuli were either selected randomly, using our adaptive algorithm or using a more  
93 classical approach of measuring psychometric curves around a variety of fixed references. We found that  
94 when stimuli are selected adaptively, the accuracy of model comparison improved. We also tested our  
95 algorithm in real subjects by inferring which of three sensory noise models best explains their behavior  
96 in a speed perception task. To do this, we used a psychophysical experiment in which stimuli were either  
97 selected randomly or adaptively. The adaptive procedure converged to the model proposed in earlier  
98 work (Stocker & Simoncelli, 2006) whereas the random sampling method was often inconclusive about  
99 the underlying noise model. Second, we tested the algorithm on dissociating two models of saccadic  
100 target selection under whole body acceleration (Rincon-Gonzalez et al., 2016). Based on the original  
101 experimental data it is hard to dissociate between an acceleration-dependent or acceleration-independent  
102 target selection model at the individual subject level. However, using simulations, we show that selecting  
103 the stimuli adaptively could have led to stronger conclusions during model comparison. We conclude

104 that our technique is more accurate and faster than the current methods to dissociate psychophysical  
105 models. In addition, we provide a python implementation of our algorithm, as well as the code and data  
106 to perform the simulations and analysis presented.

## 107 Methods

108 Our algorithm is based on an experimenter wishing to determine which of a set of  $m$  discrete psychophys-  
109 ical models best describes subject's behavior, under the assumption that the model underlying subjects  
110 behavior is contained in the set of models. Under a traditional experimental approach an experimenter  
111 would present a number of stimuli  $\mathbf{x}$  to a subject and obtain the corresponding responses to these stimuli  
112  $\mathbf{r}$ . Using Bayes' rule, we can compute the probability of a particular psychophysical model  $m$  given the  
113 responses and stimuli as:

$$p(m|\mathbf{r}, \mathbf{x}) = \frac{p(\mathbf{r}|\mathbf{x}, m)p(m)}{\sum_m p(\mathbf{r}|\mathbf{x}, m)p(m)} \quad (1)$$

114 where  $p(m)$  is the prior probability of each model  $m$ ,  $p(m|\mathbf{r}, \mathbf{x})$  is the posterior distribution of each  
115 model and  $p(\mathbf{r}|\mathbf{x}, m)$  is referred to as the marginal likelihood. The marginal likelihood is obtained by  
116 marginalizing over the parameters  $\theta$  of the particular model:

$$p(\mathbf{r}|\mathbf{x}, m) = \sum_{\theta} p(\mathbf{r}|\mathbf{x}, \theta, m)p(\theta|m) \quad (2)$$

117 Equation 1 makes it clear that our ability to dissociate models is dependent on the stimuli  $\mathbf{x}$  that  
118 were presented to the subject. Different stimuli and responses produce different posterior distributions  
119 of models. We can characterize the quality of a possible posterior using a particular utility function.  
120 Following previous work in model comparison, we use the entropy of the posterior distribution to char-  
121 acterize its quality (Cavagnaro et al., 2010, 2011, 2013; DiMattina, 2016):

$$H(\mathbf{x}, \mathbf{r}) = - \sum_m p(m|\mathbf{x}, \mathbf{r}) \log(p(m|\mathbf{x}, \mathbf{r})) \quad (3)$$

122 A posterior with lower entropy entails more certainty about which model underlies the subjects'  
123 behavior. A minimal entropy distribution across models would be a posterior mass of 1 at a single  
124 model and 0 at all others.

125 How should we select stimuli to minimize the expected entropy of the model posterior? Here we

126 propose using a similar approach to that used previously for minimizing the entropy of a parameter pos-  
127 terior (Kontsevich & Tyler, 1999), by numerically calculating on each trial the stimulus that minimizes  
128 the expected entropy of the model posterior. For our algorithm, we represent the possible stimuli on  
129 each trial  $x$  and parameters  $\theta$  on discrete grids, similar to Kontsevich and Tyler (1999). This requires  
130 three quantities: a prior distribution over models  $p(m)$ , a prior distribution of parameters for each model  
131  $p(\theta|m)$ , and a likelihood look-up table for each model  $p(r|x, \theta, m)$  which represents the probability of a  
132 response given a model and parameter set. Using these quantities, we can design an iterative algorithm  
133 to select the optimal stimuli on a trial-to-trial basis, which is as follows:

- 134 1. Calculate for each model and all possible stimuli the marginal likelihood of a response at trial  $t$   
135 given stimulus  $x$ :

$$p_t(r|x, m) = \sum_{\theta} p(r|x, \theta, m)p_t(\theta|m)$$

- 136 2. Compute the posterior distribution of models given response  $r$  in the next trial to stimulus  $x$ :

$$p_t(m|r, x) = \frac{p_t(r|x, m)p_t(m)}{\sum_m p_t(r|x, m)p_t(m)}$$

137 Note,  $\sum_m p_t(r|x, m)p_t(m)$  can also be written  $p_t(r|x)$  and should be stored as the term is also  
138 used in step 4.

- 139 3. Compute the entropy of the posterior distribution over models given presented stimulus  $x$  and  
140 response  $r$ :

$$H_t(x, r) = - \sum_m p_t(m|x, r) \log(p_t(m|x, r))$$

- 141 4. Because the response is unknown before the trial, we must marginalize over all possible responses  
142 to obtain the expected entropy:

$$E[H_t(x)] = \sum_r H_t(x, r)p_t(r|x)$$

5. Find the stimulus that produces a posterior with the minimum expected entropy:

$$x_{t+1} = \arg \min_x E[H_t(x)]$$

- 143 6. Use  $x_{t+1}$  as the stimulus on the next trial to receive response  $r_{t+1}$ .
- 144 7. Because step 1 requires a prior on the parameters  $p_t(\theta|m)$ , this prior must be recursively updated  
145 in addition to updating the model priors. As such we set the parameter and model priors to their  
146 posteriors:

$$p_t(\theta|m, r_{t+1}, x_{t+1}) = \frac{p_t(\theta|m)p(r_{t+1}|x_{t+1}, \theta, m)}{\sum_{\theta} p_t(\theta|m)p(r_{t+1}|x_{t+1}, \theta, m)}$$

$$p_{t+1}(\theta|m) = p_t(\theta|m, r_{t+1}, x_{t+1})$$

$$p_{t+1}(m) = p_t(m|r_{t+1}, x_{t+1})$$

- 147 8. Return to the first step until the desired number of trials is completed or sufficient model evidence  
148 has been obtained.

## 149 Experiment 1: Velocity judgment

### 150 Introduction

151 Most computational models of perception and action take one particular assumption about how the sen-  
152 sory uncertainty depends on the stimuli presented. For example, there are models that assume sensory  
153 noise is constant and independent of the stimuli presented (Kording et al., 2007; Weiss, Simoncelli, &  
154 Adelson, 2002), some assume a linear increase in the standard deviation of the noise with the stimulus  
155 magnitude (Battaglia, Kersten, & Schrater, 2011; Sanborn & Beierholm, 2016), others take a combina-  
156 tion of these two (Odegaard, Wozny, & Shams, 2015; Petzschner & Glasauer, 2011; Stocker & Simoncelli,  
157 2006). To our knowledge only a few papers made an explicit comparison between sensory noise models  
158 (Acerbi et al., 2012, 2017; Jazayeri & Shadlen, 2010). A striking finding in these comparison studies  
159 is that the sensory noise model can vary among subjects (Acerbi et al., 2012, 2017). Given that the  
160 predictions of complex models, for example, models of multisensory integration (Acerbi et al., 2017)  
161 are dependent on the assumed sensory noise model, it is important to have an accurate model of each  
162 subject's sensory noise model. It is therefore essential to validate the assumed sensory noise model to  
163 ensure it is accurate.

164 One way to validate these assumptions is by performing an additional experiment designed to es-  
165 timate the observer's sensory noise model. However, performing an additional experiment requires

166 more time and resources. Being able to minimize the number of trials required to perform this type  
167 of comparison (as well as increasing the inference accuracy) is therefore beneficial. This presents a  
168 potential use of our algorithm, a method to validate sensory noise models and infer them for use in  
169 more complex models. Here, we use both simulation and a behavioral experiment to demonstrate that  
170 our algorithm can be used to facilitate inference of a subject’s sensory noise model. More specifically,  
171 as an illustrative example, we focus on inferring the sensory noise model underlying speed perception.  
172 We used this paradigm for two reasons. First, it is experimentally quick to test so we can compare our  
173 algorithm to other methods of stimuli selection. Second, previous work assumed a sensory noise model  
174 which consisted of both a constant component (the sensor is not perfect even when speed is zero) and  
175 a component that linearly increases with speed (Stocker & Simoncelli, 2006) and thus we can compare  
176 our inference to this model.

## 177 **Methods**

### 178 **Models**

179 In order to test between different sensory noise models we need to specify a model of the subjects’  
180 responses. We derived a simple 2-afc model of subject responses using signal detection theory (see  
181 appendix A). This leads to the response probability given a probe  $s_2$  and a reference  $s_1$ , described by:

$$p(r|s_2, s_1, \theta) = \lambda + (1 - 2\lambda)\Phi(s_2 - s_1; \alpha, \sigma_2^2(m) + \sigma_1^2(m)) \quad (4)$$

182 in which  $\Phi$  is the cumulative density function of a Gaussian distribution, evaluated at point  $s_2 - s_1$   
183 with a mean  $\alpha$  and variance  $\sigma_2^2(m) + \sigma_1^2(m)$ ,  $\sigma_2^2(m)$  and  $\sigma_1^2(m)$  are the variances of the sensory noise  
184 for the probe and reference stimuli respectively,  $\lambda$  is a lapse rate accounting for trials where an observer  
185 guesses randomly, and  $\alpha$  is a bias parameter accounting for biases in subject’s responses. We assume the  
186 subject’s sensory noise changes with the stimulus in one of three ways. The first, and simplest model,  
187 assumes sensory variance is independent of the stimulus. We denote this the constant noise model. The  
188 second model assumes that the standard deviation of the sensory noise increases linearly with the signal  
189 intensity, and thus has zero standard deviation if the signal is absent. This model is referred to as the  
190 Weber model. Finally, we consider a model where the sensory noise is non-zero when the signal is absent  
191 and also has a linearly increasing part, which we will refer to as the generalized model.

192 For the constant model, we assume the sensory variance is constant  $\sigma^2 = (5\beta)^2$  (this parameterization



193 allows  $\beta$  to be kept in a similar range for each model), for the Weber model we assume  $\sigma^2 = (\beta s)^2$ ,  
194 and for the generalized model we assume  $\sigma^2 = \gamma^2 + (\beta s)^2$ . The above response model means we can  
195 parametrize a subject's response behavior (regardless of model) using 4 parameters,  $\theta = [\alpha, \beta, \gamma, \lambda]$ .

## 196 Simulation experiment

197 In order to investigate whether using our adaptive algorithm facilitates comparison of sensory noise  
198 models, we first performed a simulation experiment. To this end, we need to specify the grids to use for  
199 the stimuli and parameters as well as the priors. The lower bound, upper bound, and number of steps  
200 for all variables are shown in Table 1. For the prior over parameters  $p(\theta|m)$ , we assumed a uniform  
201 discrete distribution for each parameter and that the parameters are independent. Finally, for the prior  
202 over models  $p(m)$  we used a uniform distribution over the three models.

203 As different subjects could have different parameters and noise models it is important to test our  
204 algorithm over a wide range of parameters and models. As such, we first generated 2000 possible param-  
205 eter combinations. The parameters were drawn independently from a continuous uniform distribution  
206 with the same upper and lower bounds as those specified in Table 1. Next, in order to assess how well  
207 we can infer the correct generative model, we simulated 750 trials from each model for each parameter  
208 combination. This entailed using the same parameter combination for each model (as the constant and  
209 Weber models are not dependent on  $\gamma$ , it was not used for these models). The stimuli for these trials  
210 were either selected adaptively using our algorithm, or randomly from the same stimulus grid. This led  
211 to a total of 12000 simulated datasets.

212 We used uniform priors to match the uniform distribution we drew our parameters from. In practice  
213 any prior distribution could be used, but if it is continuous, the grid representation will create a discrete  
214 approximation. We also performed an additional simulation using a truncated Gaussian parameter  
215 distribution (Supplemental material) to better assess the performance of our algorithm.

| Variable         | Lower bound grid | Upper bound grid | Number of steps |
|------------------|------------------|------------------|-----------------|
| $s_1$ (deg/s)    | 0.6              | 9                | 10              |
| $s_2$ (deg/s)    | 0.3              | 9                | 20              |
| $\alpha$ (deg/s) | -0.6             | 0.6              | 17              |
| $\beta$ (-)      | 0.01             | 0.5              | 25              |
| $\gamma$ (deg/s) | 0                | 2                | 20              |
| $\lambda$ (-)    | 0                | 0.1              | 10              |

**Table 1.** Parameter grids used for simulation experiment 1 and the adaptive and random conditions in our subject experiment.  $s_1$  is the reference speed stimulus,  $s_2$  is the probe speed stimulus,  $\alpha$  is a bias parameter,  $\beta$  is a scaling parameter for the subject's sensory uncertainty,  $\gamma$  is the base sensory uncertainty of an observer (only used in the generalized model), and  $\lambda$  is the lapse rate of an observer.

## 216 Real experiment

217 We also tested whether our algorithm could facilitate model comparison in actual subjects. This was  
218 done using a 2-afc speed judgment task in which stimuli were selected in one of three ways, adaptively  
219 (using our algorithm), randomly (from the same stimulus grid as adaptive), or using the traditional  
220 approach of measuring separate psychometric curves for different reference values (Stocker & Simoncelli,  
221 2004, 2006) using the psi algorithm (Kontsevich & Tyler, 1999). We tested 6 naive subjects (4 female,  
222 aged 25-34). The experiment was approved by the local ethics committee of the Social Sciences Faculty  
223 of Radboud University. In accordance with the Declaration of Helsinki written informed consent was  
224 obtained from all subjects prior to the experiment.

225 The stimuli consisted of two drifting Gabor patches and a black fixation dot, which were drawn using  
226 PsychoPy (Peirce, 2009). Both patches were 3 deg of visual angle in size, with a spatial frequency of  
227 1.5 cycle/deg, the contrast of each was set to 90%, and the stimuli were drawn at 6 deg on either side of  
228 fixation. The background was grey with a luminance of 91.17 cd/m<sup>2</sup>. The fixation dot was 0.2 deg in  
229 size and drawn in the center of the screen. The stimuli were displayed at a resolution of 1024 by 768 on  
230 a gamma corrected 17 inch Iiyama HM903DTB monitor viewed from a distance of approximately 43.5  
231 cm.

232 On each trial, the subject saw both Gabors drift simultaneously and horizontally for 1 s. Both Gabors  
233 moved in the same direction on a given trial (direction was left or right and was selected randomly for  
234 each trial). One Gabor (the reference) drifted with speed  $s_1$  deg/s and the other (the probe) with speed  
235  $s_2$  deg/s. The subject was asked to judge which of the two was faster and indicate this with a button  
236 press. The position of the reference stimulus (left or right of fixation) was randomized on each trial.  
237 The experiment was split into two sessions, the ordering of which was counterbalances across subjects.  
238 In one session (algorithm session) subjects performed 1500 trials, 750 of which were adaptive trials and  
239 750 were random trials. On an adaptive trial, the Gabor speeds were selected using our algorithm based  
240 on the previous stimuli (and responses) generated by this algorithm; on a random trial the speed of  
241 each Gabor was selected randomly from the stimulus grid. The stimuli and parameter grids used were  
242 the same as for the simulation experiment. In this session the screen was refreshed at 72 Hz.

243 In another session (psi session), subjects performed 750 trials designed to measure their psychometric  
244 curve for five reference values (150 trials per reference, see Table 2 for the reference values used). On  
245 each trial,  $s_1$  was randomly selected from a set of 5 possible values, the value of  $s_2$  on this trial was  
246 then selected using the psi-marginal algorithm (Prins, 2013) (see Table 2 for the grids used). This was

247 done in order to maximize the information gain about  $\mu$  (the point of subjective equality) and  $\sigma$  (the  
 248 standard deviation) for this particular value of  $s_1$  under the assumption the probability of a subjects  
 249 response follows:

$$p(r|s_2, s_1) = \lambda + (1 - 2\lambda)\Phi(s_2; \mu, \sigma^2) \quad (5)$$

250 in this equation  $\sigma^2$  is the variance of the normal distribution and  $\mu$  is the mean of the distribution.  
 251 Selecting stimuli in this manner, allows us to assess how effective the more traditional fixed reference  
 252 approach is to separating sensory noise models compared to our algorithm. In this session, stimuli were  
 253 refreshed at 144 Hz. Note that the probe  $s_2$  had a denser grid in this session (see Table 2 compared to  
 254 Table 1); this allows us to better estimate the psychometric curve of each subject but may also give an  
 255 advantage to this method in terms of model comparison. Prior to each session, subjects performed 20  
 256 practice trials from the respective session.

| Variable         | Lower bound grid | Upper bound grid | Number of steps | Prior       | $s_1$ (deg/s) |
|------------------|------------------|------------------|-----------------|-------------|---------------|
| $\mu$ (deg/s)    | 0.001            | 3                | 41              | $N(0.5, 2)$ | 0.5           |
| $\sigma$ (deg/s) | 0.01             | 3                | 51              | $U$         | 0.5           |
| $\lambda$ (-)    | 0                | 0.1              | 15              | $B(2, 20)$  | 0.5           |
| $s_2$ (deg/s)    | 0.01             | 3                | 61              | N/A         | 0.5           |
| $\mu$ (deg/s)    | 0.001            | 4                | 41              | $N(1, 2)$   | 1             |
| $\sigma$ (deg/s) | 0.01             | 4                | 51              | $U$         | 1             |
| $\lambda$ (-)    | 0                | 0.1              | 15              | $B(2, 20)$  | 1             |
| $s_2$ (deg/s)    | 0.01             | 4                | 61              | N/A         | 1             |
| $\mu$ (deg/s)    | 0.1              | 6                | 41              | $N(2, 2)$   | 2             |
| $\sigma$ (deg/s) | 0.01             | 6                | 51              | $U$         | 2             |
| $\lambda$ (-)    | 0                | 0.1              | 15              | $B(2, 20)$  | 2             |
| $s_2$ (deg/s)    | 0.1              | 6                | 61              | N/A         | 2             |
| $\mu$ (deg/s)    | 1                | 9                | 41              | $N(4, 2)$   | 4             |
| $\sigma$ (deg/s) | 0.01             | 9                | 51              | $U$         | 4             |
| $\lambda$ (-)    | 0                | 0.1              | 15              | $B(2, 20)$  | 4             |
| $s_2$ (deg/s)    | 1                | 9                | 61              | N/A         | 4             |
| $\mu$ (deg/s)    | 0.001            | 14               | 41              | $N(4, 2)$   | 8             |
| $\sigma$ (deg/s) | 0.01             | 14               | 51              | $U$         | 8             |
| $\lambda$ (-)    | 0                | 0.1              | 15              | $B(2, 20)$  | 8             |
| $s_2$ (deg/s)    | 3                | 14               | 61              | N/A         | 8             |

**Table 2.** Parameter grids used in our fixed reference condition.  $N(a, b)$  indicates the prior was normally distributed with mean  $a$  and standard deviation  $\sigma$ ,  $U$  indicates a discrete uniform distribution and  $B(a, b)$  indicates a beta distribution with shape parameters  $a$  and  $b$ . The values for  $s_1$  were determined based on previous work on speed perception (Stocker & Simoncelli, 2004). The prior for  $\mu$  was selected based on the assumption that the psychometric curve for a 2-afc task will be close to unbiased. The prior for  $\lambda$  was selected based on recommendations for the psignifit toolbox (Fründ, Haenel, & Wichmann, 2011) (see <http://psignifit.sourceforge.net>).

## 257 Analysis

258 For our analysis, we used Python 2.7 (Python Software Foundation, <https://www.python.org>) and  
259 additional python based toolboxes, primarily SciPy (Jones, Oliphant, Peterson, & others, 2001), Numpy  
260 (Walt, Colbert, & Varoquaux, 2011), Matplotlib (Hunter, 2007), scikit-learn (Pedregosa et al., 2011)  
261 and Pandas (McKinney & others, 2010).

262 In addition to computing the model probabilities for every subject for the different sampling methods,  
263 we also estimated each subject’s parameters for each model by maximizing the log-likelihood of the  
264 parameter values based on the subject’s responses (to increase accuracy we pooled the data from all  
265 sessions). This provides more sensitive parameter estimates than the grid we used for model comparison  
266 and also allows us to check the parameters are not close to the edges of the grids we used.

267 We assumed the subject’s responses are independent across trials. The subject’s response probability  
268 on each trial can then be computed using equation 4. The log-likelihood of a parameter set given a  
269 subject’s entire data set, is given by

$$\log(L(\theta)) = \sum_i^{2250} \log(\text{Bern}(\mathbf{r}_i, p(\mathbf{r}_i | \mathbf{s}_{2i}, \mathbf{s}_{1i}, \theta))) \quad (6)$$

270 in which  $i$  is the trial index,  $\mathbf{r}$  is a vector of subject response,  $\mathbf{s}_1$  is a vector of the reference stimuli,  $\mathbf{s}_2$   
271 is a vector of probe stimuli and *Bern* stands for a Bernoulli distribution.

272 Parameter estimates  $\hat{\theta}$  were then obtained by minimizing the negative log-likelihood:

$$\hat{\theta} = \arg \min_{\theta} (-\log(L(\theta))) \quad (7)$$

273 This optimization was done numerically using the L-BFGS-B algorithm (Byrd, Lu, Nocedal, & Zhu,  
274 1995), implemented in SciPy (Jones et al., 2001) and applied in the `scipy.optimize.minimize` function.  
275 The L-BFGS-B is an iterative algorithm designed to optimize a nonlinear function subject to parameter  
276 boundaries (Byrd et al., 1995). The parameter bounds were set to those in Table 1. To ensure a global  
277 minimum was found we used 100 random initializations and selected the parameter set with the highest  
278 log-likelihood. The initial values were obtained by drawing each parameter value from a continuous  
279 uniform distribution with the same bound as those in Table 1.

280 In order to validate the results of the grid-based model comparison we also computed the Akaike  
281 Information Criterion (AIC) for each of the models. This is a metric which summaries how well a model  
282 fits (higher likelihood) the data while correcting for the number of parameters (Akaike, 1974; Burnham,

283 Anderson, & Burnham, 2002),

$$AIC = 2k - 2 \log(L(\hat{\theta})) \quad (8)$$

284 in which  $k$  is the number of parameters of the model. It is important to note that computing model  
285 probabilities using equation 1 also implicitly corrects for the number of parameters (MacKay, 2003).

## 286 Results

### 287 Simulation experiment

288 Figure 1 shows the model probabilities over trials averaged across the different parameter sets from  
289 our simulation experiment. As expected, the model probabilities trend towards 1 along the diagonal,  
290 indicating that both adaptive and random sampling converge towards the correct model. This demon-  
291 strates that our algorithm does not introduce any bias during model comparison, even when the number  
292 of parameters differs between models. It can also be observed that the probability of the correct model  
293 rises faster and is higher when we select stimuli adaptively (green curves) than when stimuli are selected  
294 randomly (orange curves). This indicates the strength of evidence towards the correct model is higher  
295 when we use adaptive sampling.

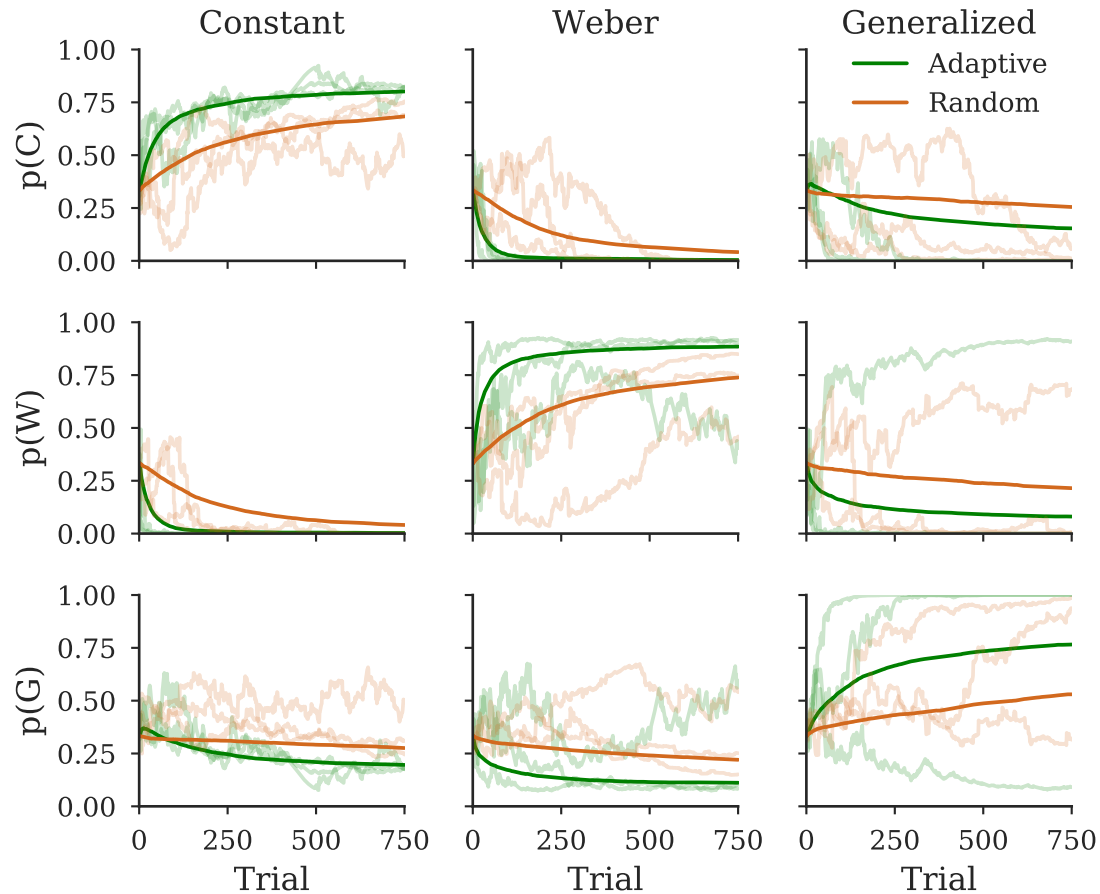

**Figure 1.** Evolution of model probabilities over trials for different generative models and algorithms. Columns indicate the model used to generate the data, rows indicate the probability of each model. The dark lines indicate the mean probability averaged over simulations, light lines indicate example simulations. Green coloring indicates stimuli were selected adaptively, orange coloring indicates stimuli were selected at random from the same stimulus grid.

296 Although Figure 1 provides evidence that adaptive sampling improves the strength of evidence  
 297 towards the correct model, it does not quantify how this increase would affect the conclusions of an  
 298 experiment. In order to quantify the practical benefit of adaptive sampling, we computed the ratio of  
 299 the probability of the generative model against the other models (commonly referred to as the Bayes  
 300 factor). This ratio represents how much more probable one model is than the other model (MacKay,  
 301 2003). Because we consider three models, this yields two Bayes factors, which the experimenter can use  
 302 to decide whether there is significant evidence in favor of a particular model. A commonly used criterion  
 303 is a that a Bayes factor over 3 indicates positive evidence towards this model (Kass & Raftery, 1995).

304 Figure 2 shows the proportion of simulations where the Bayes factors for the correct model against  
 305 the other two models were both over 3. This represents the proportion of simulations in which we would

306 find evidence in favor of the correct model. We see that adaptive sampling has a higher proportion than  
 307 random sampling, indicating an experimenter would conclude in favor of the correct model more often  
 308 using adaptive sampling. For example, an experimenter would be twice as likely to find strong evidence  
 309 in favor of the correct model using our approach if the underlying model was the generalized one.

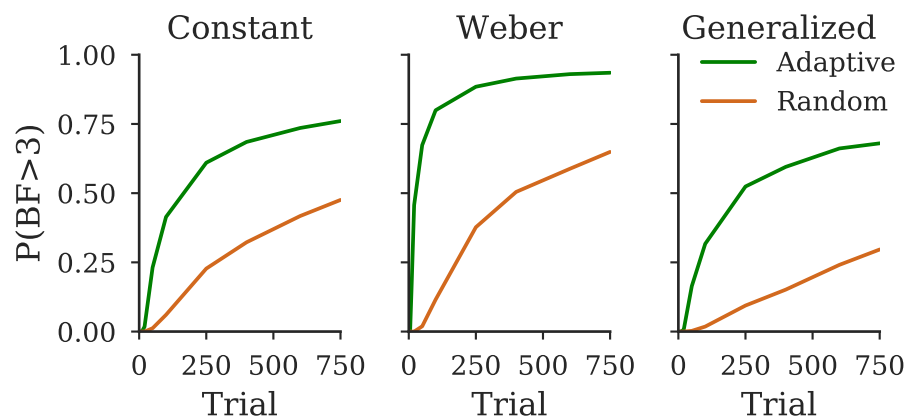

**Figure 2.** Proportion of simulations where both Bayes factors of the generative model relative to an alternative model is over 3, plotted as a function of the number of trials. Each column indicates the model used to generate the data.

| Subject | Model       | $\alpha$ (deg/s) | $\beta$ (-) | $\lambda$ (-) | $\gamma$ (deg/s) | $\Delta AIC$ |
|---------|-------------|------------------|-------------|---------------|------------------|--------------|
| 1       | Weber       | -0.043           | 0.354       | 0             | N/A              | -17.459      |
| 1       | Constant    | 0.075            | 0.073       | 0.1           | N/A              | -202.656     |
| 1       | Generalized | 0.006            | 0.314       | 0             | 0.187            | 0            |
| 2       | Weber       | -0.009           | 0.223       | 0.005         | N/A              | -16.031      |
| 2       | Constant    | 0.043            | 0.061       | 0.054         | N/A              | -220.883     |
| 2       | Generalized | 0.016            | 0.197       | 0.004         | 0.122            | 0            |
| 3       | Weber       | -0.136           | 0.268       | 0.055         | N/A              | -171.633     |
| 3       | Constant    | 0.027            | 0.195       | 0.027         | N/A              | -141.811     |
| 3       | Generalized | 0.049            | 0.222       | 0.002         | 0.584            | 0            |
| 4       | Weber       | -0.034           | 0.308       | 0.003         | N/A              | -14.415      |
| 4       | Constant    | 0.026            | 0.052       | 0.1           | N/A              | -180.728     |
| 4       | Generalized | 0.002            | 0.272       | 0.004         | 0.161            | 0            |
| 5       | Weber       | 0.019            | 0.256       | 0.023         | N/A              | -109.731     |
| 5       | Constant    | 0.074            | 0.182       | 0.007         | N/A              | -151.102     |
| 5       | Generalized | 0.041            | 0.18        | 0             | 0.447            | 0            |
| 6       | Weber       | -0.028           | 0.424       | 0             | N/A              | -85.408      |
| 6       | Constant    | 0.19             | 0.188       | 0.06          | N/A              | -175.483     |
| 6       | Generalized | 0.149            | 0.303       | 0             | 0.533            | 0            |

**Table 3.** Best fit parameters and AIC ( $\Delta AIC$ , generalized - other model) of each model and subject.

310 While Figure 2 shows that adaptive sampling increases the probability of concluding in favor of the  
 311 true generative model, it is not apparent why the proportion of Bayes factors over 3 is lower when stimuli  
 312 are selected randomly. One possibility is that random sampling still supports the true generative model

313 but the strength of this support is insufficient; another possibility is that random sampling supports the  
314 incorrect model.

315 In order to explore these possibilities we plotted the probability of the correct model for each sampling  
316 method as a function of  $\beta$  and  $\gamma$  (see Figure 3). Figure 3 shows that the model probabilities are primarily  
317 green to yellow when the generative model is Weber or Constant. This indicates both methods mostly  
318 select the correct model. We can also see that in general adaptive sampling produces model probabilities  
319 which trend closer to 1 (i.e. yellow) indicating stronger evidence in favor of the correct model. When the  
320 generative model is the Generalized model, a substantial number of simulations produce probabilities  
321 supporting alternative models (indicated by the blue shading). At first this seems counter intuitive.  
322 However, for small values of  $\gamma$  and  $\beta$ , the generalized model becomes almost equivalent to the Weber  
323 and constant model. Because these have fewer parameters, they are favored in this situation.



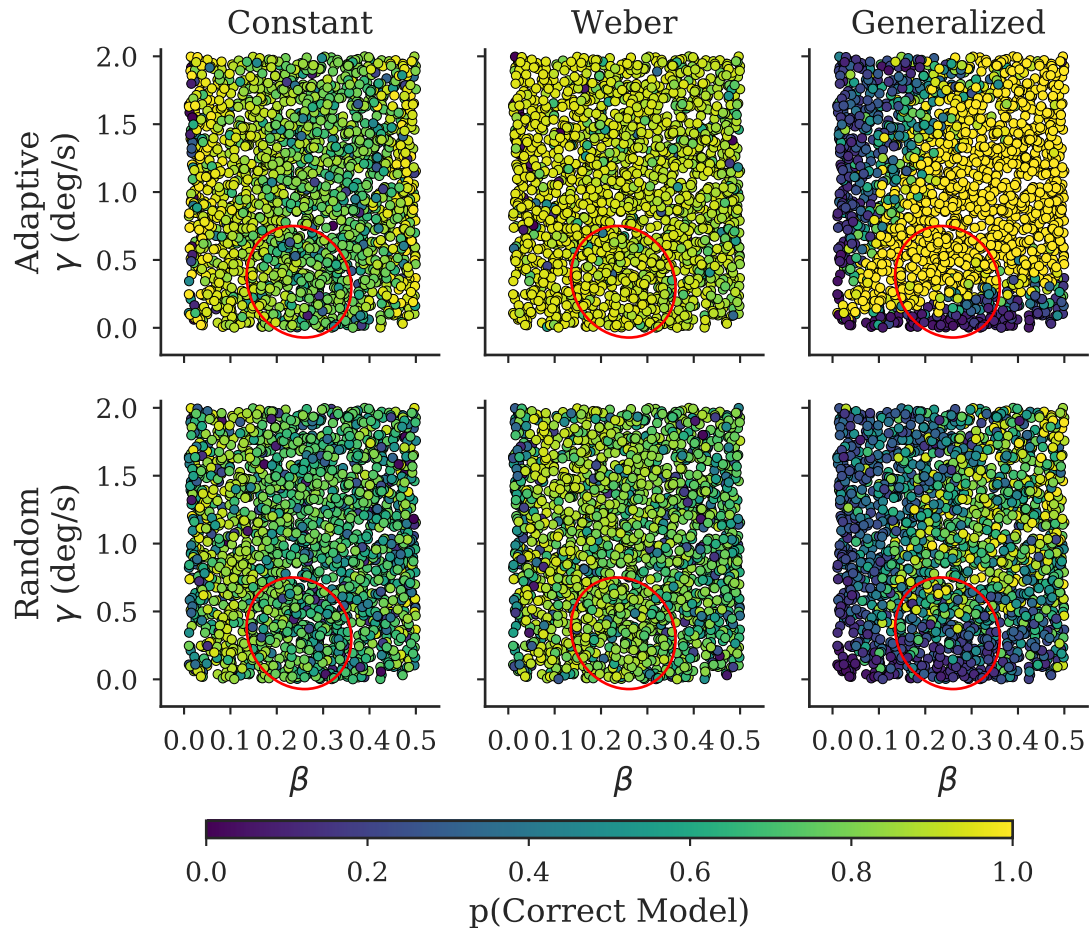

**Figure 3.** Probability of the generative model as a function of parameter values for different generative models and algorithms. Columns indicate the model used to generate the data, rows indicate the sampling method used to determine stimuli. Each point indicates the probability of the correct model as a function of the parameters  $\gamma$  and  $\beta$  for one simulation. Note, the Weber and constant models are independent of  $\gamma$  and thus model probabilities do not change systematically as a function of  $\gamma$ . The  $\gamma$  value plotted refers to the  $\gamma$  used in the generalized model for this simulation, all other parameters are shared between the models. The red ellipse indicates the mean  $\pm$  two standard deviations of the subjects' parameter estimates for  $\gamma$  and  $\beta$  obtained from the generalized model (see Table 3)

### 324 Actual experiment

325 The previous section suggests that, in simulation, adaptive sampling provides a large benefit to model  
 326 comparison. We next tested whether this improvement also transfers to actual experiments. Figure  
 327 4 shows the model probabilities of each subject obtained from our speed perception experiment and  
 328 the average across subjects. As shown, on average adaptive sampling supports the generalized model,  
 329 which is consistent with previous work (McKee, Silverman, & Nakayama, 1986; Stocker & Simoncelli,

330 2006). By contrast, both random sampling and sampling from the psi algorithm are indecisive as to the  
331 underlying noise model. The reason follows from inspecting the individual subject data. When stimuli  
332 are selected adaptively, the probability of the generalized model is high for all subjects. By contrast,  
333 random sampling supports the Weber model for 3 subjects and the generalized for the others (although  
334 the probability is lower than that found from adaptive sampling). The psi session provides similar  
335 results to the random session; 3 subjects are best described by a generalized model and the remaining  
336 by the Weber model. Given that the findings of the different sampling methods are disparate, we also  
337 computed AIC values on the data of all sessions grouped together, which allows us to assess which model  
338 is the best based on the entire data set (see Table 3). Shown by this table, the AIC results favor the  
339 generalized model for every subject, indicating that the results of the adaptive sampling method are  
340 comparable to the results of the grouped data. In addition, to assess the possibility that our adaptive  
341 technique was supporting the incorrect model, we performed additional simulations to verify that the  
342 observed differences between the sampling methods are as expected. Indeed, when the data is generated  
343 from the generalized model, the random sampling method often converges to the wrong, i.e Weber  
344 model (see Supplementary material). Together this suggests the conclusions drawn from the adaptive  
345 sampling method are more accurate than conclusion drawn from both random sampling or measuring  
346 independent psychometric curves.

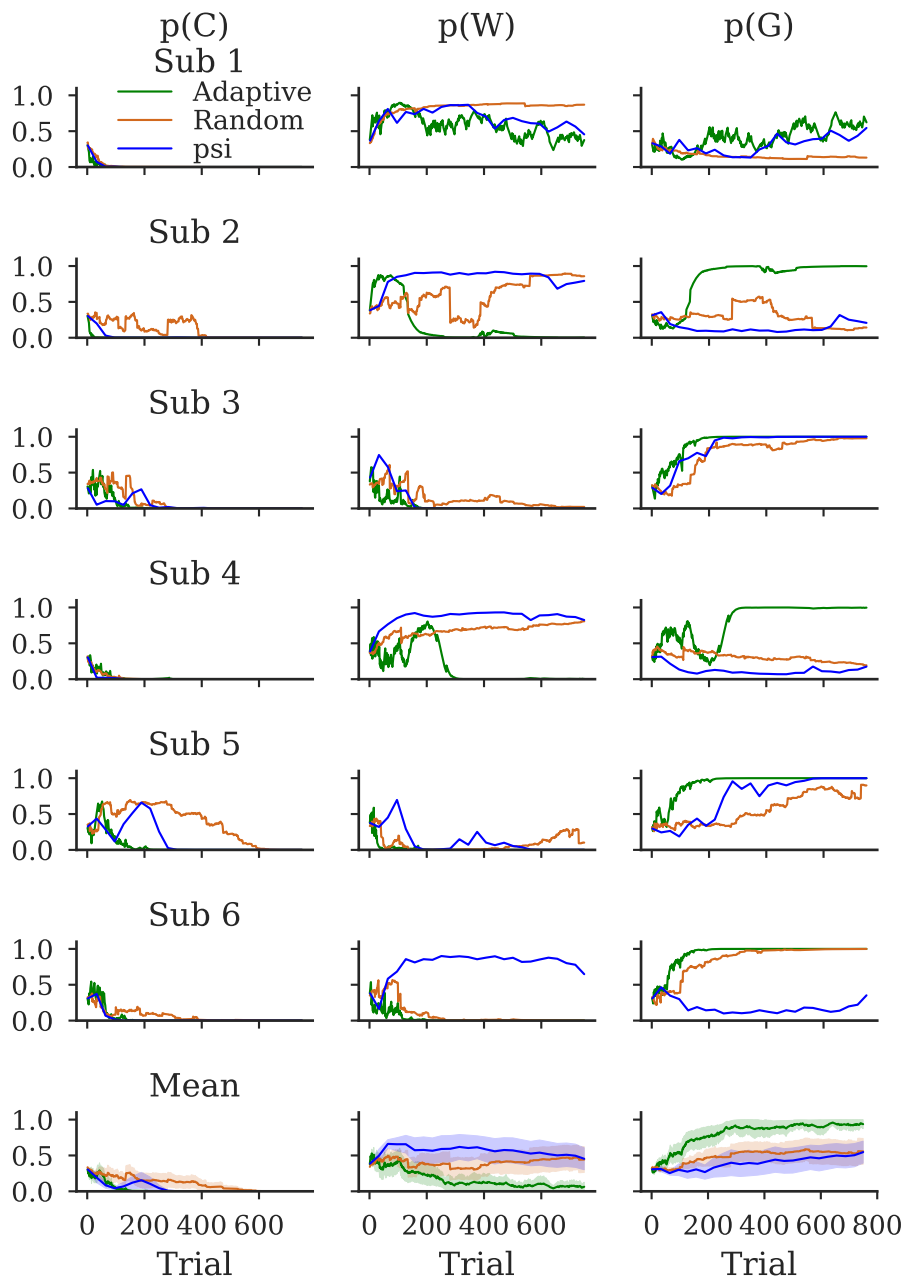

**Figure 4.** Evolution of model probabilities over trials for each subject. Columns indicate the probability of a particular model, rows indicate the subject. Green lines show the model probabilities when the stimuli were selected adaptively using our algorithm, orange lines indicate the model probabilities when stimulus were selected at random from the same stimuli grid, and blue lines indicate stimuli were selected using the psi algorithm. The lines in the mean plot show the mean model probabilities over subjects, the shaded area indicates  $\pm 1$  SEM over subjects.

347

Although the results of the model comparison match previous work, it is important to note that a

348 model being the most likely does not entail it fits the data well, just that it fits better than the other  
349 models. It is important to check the predictions of the models against the data.

350 Figure 5 illustrates the data of each subject obtained from the psi session as well as the predicted  
351 psychometric curves obtained from fitting the models to the data obtained from the adaptive algorithm  
352 only (therefore the models were not fit to the data shown). As shown, the constant model is in general  
353 a poor predictor of the data. By contrast, both the predictions of the Weber and generalized model are  
354 close to the data. This matches the results of AIC comparison (see Table 3) which indicated that the  
355 Weber and generalized model produce better fits to the data than the constant model. This also means  
356 that the assumptions with regards to our models (see Appendix A) are reasonable.

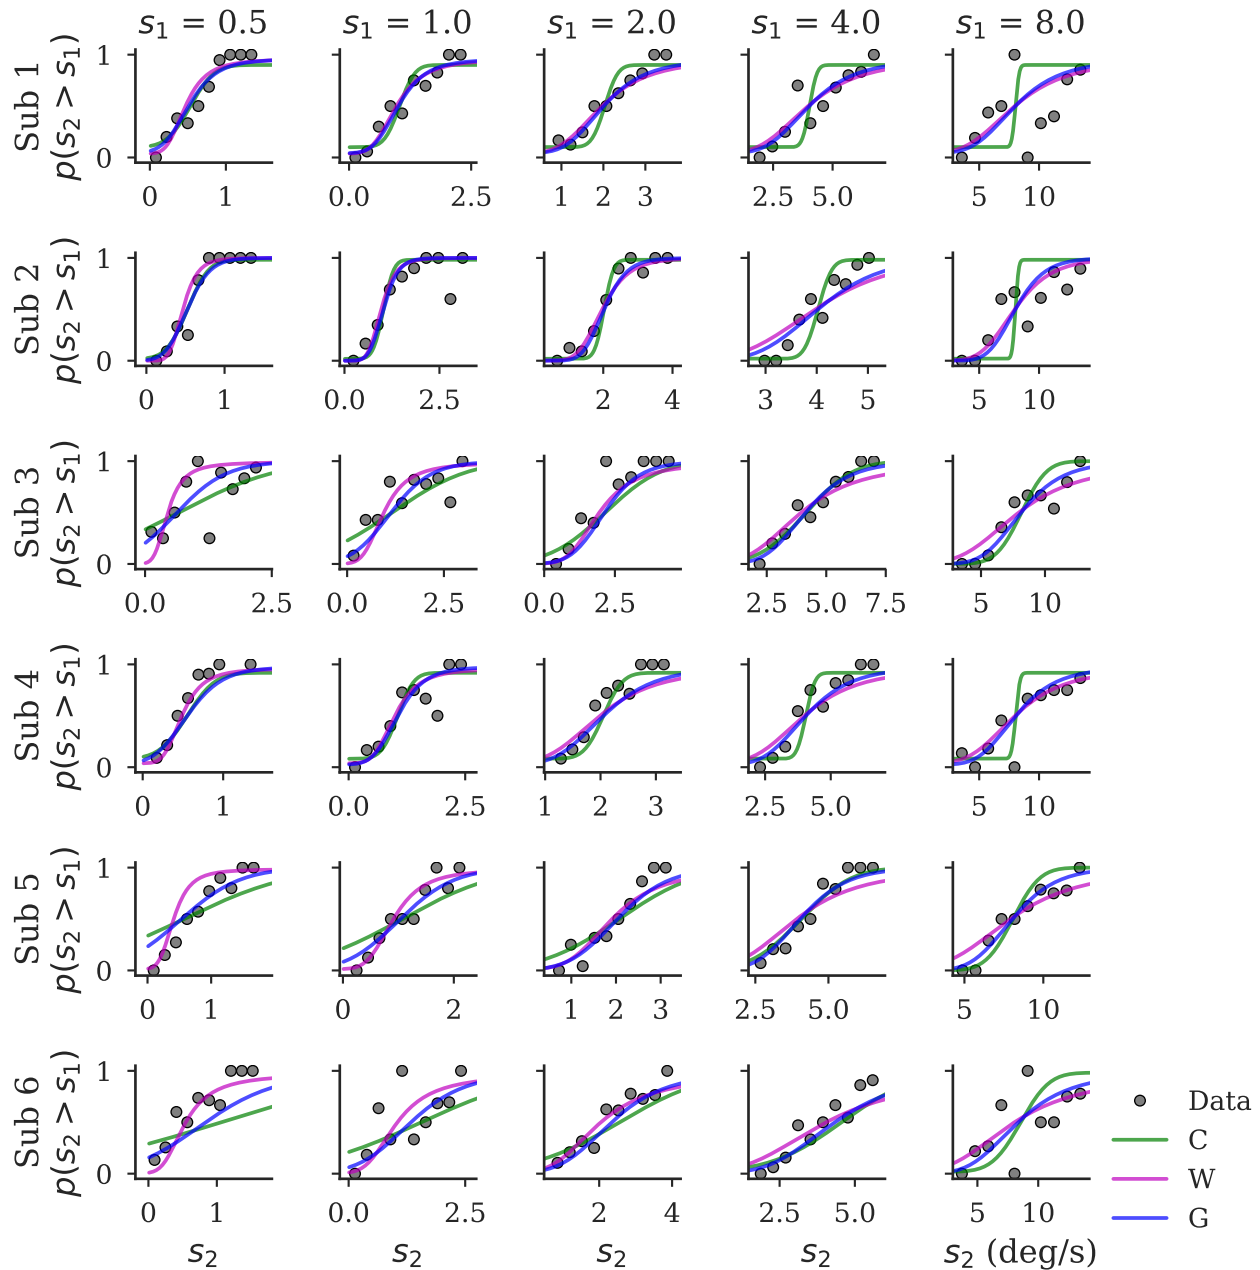

**Figure 5.** Data and model predictions for psychometric curves measured in the psi session. Each row indicates the psychometric curves of a particular subject, each column indicates the reference value ( $s_1$ ) for this psychometric curve. Grey dots indicate proportion of trials where observers report  $s_2 > s_1$ , proportions were obtained by binning responses in 10 bins from the minimum to maximum probe value ( $s_2$ ) for this subject and reference ( $s_1$ ) value. Curves indicate the predicted proportion from each of the models. Note, the parameters used for the predictions were obtained from fitting only to stimuli selected using our algorithm and thus were not fit to the data shown.

357 Another important property of adaptive algorithms is that they do not sample uniformly across the  
 358 entire stimulus space. Instead, the stimuli selected are those that are most informative to compare the

359 models. In order to visualize which stimuli these are in this experiment we plotted the stimuli selected  
360 using the adaptive method for a representative subject (see Figure 6). The adaptive sampling method  
361 alternates between high and low speeds for the reference and probe stimuli. This sampling strategy is  
362 sensible as the noise models make distinct predictions for high and low speeds and thus sampling at  
363 high and low speeds allows for effective dissociation of the models.

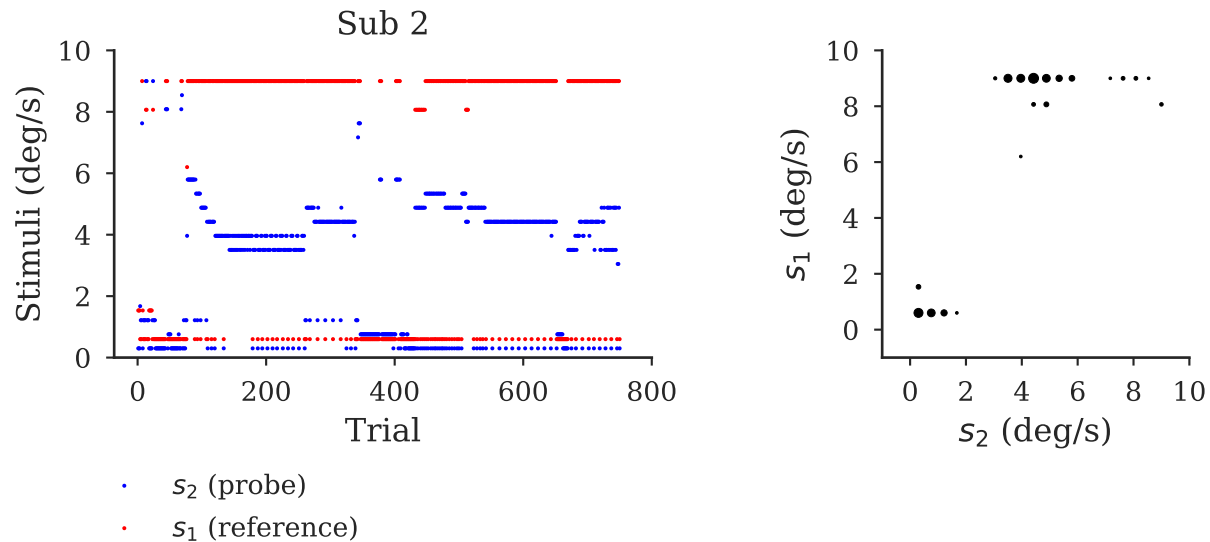

**Figure 6.** Stimuli adaptively selected for subject 2. The left plot shows the probe (blue dots) and reference (red dots) selected on each trial in experiment 1. The right plot shows a scatter plot of the combination of probe and reference. Radius of the data points is proportional to  $\sqrt{N}$  where  $N$  is the number of times this combination was selected.

## 364 Experiment 2 : Target selection

### 365 Introduction

366 The previous section illustrates the use of our algorithm as a method to dissociate different sensory noise  
367 models. However, this is only one example comparison. To ensure our algorithm is broadly applicable, it  
368 is important to validate it in multiple settings. Here, as an additional application, we consider comparing  
369 models of saccadic target selection during self-motion (Rincon-Gonzalez et al., 2016), a study recently  
370 performed in our lab. This example allows us to investigate how much benefit our algorithm provides  
371 when the models being compared are highly non-linear and the signal-to-noise ratio in the data is low.

372 In this experiment, subjects were passively translated from left to right in a sinusoidal motion profile  
373 and at 8 pre-defined phases of the oscillation two targets were presented. The subjects were instructed to

374 make a saccade to one of the two targets, which were presented asynchronously with a particular stimulus  
375 onset asynchrony (SOA). This produces a single psychometric curve of subject’s choice as a function of  
376 SOA for each phase. This curve can then be used to determine the SOA at which the probability of  
377 selecting each target is equal, referred to as the balanced time delay (BTD). The experiment showed  
378 that, on the group level, BTD changes sinusoidally as a function of the motion phase suggesting that  
379 subject’s target selection behavior, and thus preference, is influenced by current body motion. However,  
380 the amplitude of the modulation was small and the signal-to-noise ratio was low, which made comparing  
381 a sinusoidal modulation to alternative models difficult at the individual subject level. Our algorithm  
382 may provide a solution to this difficulty, as adaptive sampling selects the most informative stimuli to  
383 dissociate the selected models.

384 Here, we first reanalyze data from this experiment and show that the data of approximately half of  
385 the subjects are best described by a sinusoidal modulation rather than a constant choice bias. In other  
386 subjects the results of the model comparison are inconclusive. We next demonstrate with simulations  
387 that using our algorithm for stimulus selection would have improved model comparison accuracy. This  
388 suggests our algorithm is also useful to help dissociate models in circumstances where the signal-to-noise  
389 ratio is limited.

## 390 **Methods**

### 391 **Models**

392 In order to test whether self-motion has any effect on psychophysical choice behavior we consider two  
393 models of choice behavior, a constant bias model and a sinusoidal bias model (Bakker et al., 2017). We  
394 model choice behavior as:

$$p(r|\phi, SOA) = \Phi(SOA; \mu, \sigma) \quad (9)$$

395 in which  $r$  is the subject’s response,  $\phi$  is the phase at which the targets are presented,  $\Phi$  is a  
396 cumulative Gaussian with mean  $\mu$  and standard deviation  $\sigma$  evaluated at the *SOA*. For the constant  
397 model,  $\mu$  is a fixed value across phases:  $\mu = \alpha$ . In this model choices are independent of the phase  
398 of the motion. The sinusoidal model entails  $\mu$  changes sinusoidally as a function of phase, and is thus  
399 written  $\mu = \alpha + \beta \sin(\phi + \phi_o)$ , in which  $\alpha$ ,  $\beta$  and  $\phi_o$  are free parameters representing a subject’s fixed  
400 bias, amplitude of the modulation and phase offset, respectively. Regardless of the model, we can

401 parameterize the subject response probability using  $\theta = [\alpha, \beta, \phi_o, \sigma]$ .

## 402 **Reanalysis**

403 In order to test whether the individual subject's choice behavior is modulated sinusoidally and to obtain  
404 reasonable parameters to utilize in our simulations we reanalyzed the data of 17 subjects from Rincon-  
405 Gonzalez et al. (2016). We fit both the sinusoidal and constant bias models to each subject's choice  
406 data. We assumed the responses are independent across trials. The response probability on each trial  
407 can be computed using equation 9. The log-likelihood of a subjects' data set is then,

$$\log(L(\theta)) = \sum_i^N \log(\text{Bern}(\mathbf{r}_i, p(\mathbf{r}_i|\mathbf{SOA}_i, \phi_i, \theta))) \quad (10)$$

408 in which  $i$  is the trial index,  $N$  is the number of trials,  $\mathbf{r}$  is a vector of subject responses,  $\mathbf{SOA}$  is a vector  
409 of the SOA's the subject was presented,  $\phi$  is a vector containing the phase the targets were presented  
410 at and  $\text{Bern}$  stands for a Bernoulli distribution.

411 Parameter estimates  $\hat{\theta}$  were then obtained using equation 7. As before this optimization was done  
412 numerically using the L-BFGS-B algorithm (Byrd et al., 1995). The parameter bounds were set to those  
413 in Table 4. To ensure a global minimum was found we used 100 random initializations and selected  
414 the parameter set with the highest log-likelihood. The initial values were obtained by drawing each  
415 parameter value from a continuous uniform distribution with the same bound as those in Table 4.

416 In order to validate the results of the grid-based model comparison we also computed the Akaike  
417 Information Criterion (AIC) for each of the models using equation 8. As an additional analysis we fit  
418 a cumulative Gaussian (see equation 5) to the data from each phase (using the same bounds as for the  
419 constant model and  $\lambda$  set to 0) to provide us with a semi-parametric estimate of BTD for each phase.

## 420 **Simulation experiment**

421 In order to investigate whether using our adaptive algorithm could help to dissociate these different  
422 models of target selection, we performed a simulation experiment. The required grids are specified in  
423 Table 4. As priors we used a uniform discrete distribution for each parameter and a uniform distribution  
424 over the two models.

425 We first generated 2000 possible parameter combinations. Parameters were drawn independently  
426 from a continuous uniform distribution with the same upper and lower bound as those specified in  
427 Table 4. Next, in order to assess how well we can infer the correct generative model for each param-



428 eter combination we simulated a synthetic subject performing 1000 trials for each generative model  
429 and parameter combination. Note, the constant model is independent of  $\beta$  and  $\phi_0$  and thus they were  
430 removed from the parameter set when simulating this model. The stimuli for these trials were selected  
431 either randomly from the stimulus grid shown in Table 4 or using our adaptive algorithm. This led to  
432 a total of 8000 simulated datasets. Additional simulations were performed based on a truncated Gaus-  
433 sian parameter distribution, reflecting the estimated behavioral parameter range (see Supplementary  
434 material).

| Variable       | Lower bound grid | Upper bound grid | Number of steps |
|----------------|------------------|------------------|-----------------|
| $\phi$ (rad)   | 0                | 5.5              | 8               |
| $SOA$ (ms)     | -250             | 250              | 25              |
| $\alpha$ (ms)  | -70              | 70               | 15              |
| $\beta$ (ms)   | 0                | 60               | 15              |
| $\phi_o$ (rad) | -3               | 3                | 15              |
| $\sigma$ (ms)  | 50               | 190              | 15              |

**Table 4.** Parameter grids used for simulation experiment 2.

## 435 Results

436 The AIC scores and parameter estimates for both models are shown in Table 5. In order to interpret the  
437 AIC scores it is useful to note that an AIC difference of over 4 is considered positive evidence towards  
438 the model with the lower score (Burnham et al., 2002). This suggests the model comparison in 8 of  
439 the subjects is ambiguous (AIC difference under 4), no subjects are best described by the constant bias  
440 model and 9 subjects are best described the sinusoidal bias model. Interestingly, it can be seen that  
441 even in the ambiguous cases the amplitude parameter  $\beta$  is not at zero. This implies the modulation of  
442 BTD is sinusoidal but the effect on the log-likelihood is insufficient to overcome the penalization for the  
443 additional parameters. This is also supported by the model predictions shown in Figure 7, illustrating  
444 that the sinusoidal model is a closer fit than the constant model to the independent estimate of BTD  
445 for each phase.

| Subject | Model           | $\alpha$ (ms) | $\beta$ (ms) | $\phi_o$ (rad) | $\sigma$ (ms) | $\Delta AIC$ |
|---------|-----------------|---------------|--------------|----------------|---------------|--------------|
| 1       | Sinusoidal Bias | 67.478        | 15.895       | -0.002         | 74.505        | 0.000        |
| 1       | Constant Bias   | 67.467        | N/A          | N/A            | 76.780        | -8.469       |
| 2       | Sinusoidal Bias | -69.792       | 19.323       | -1.653         | 158.262       | 0.000        |
| 2       | Constant Bias   | -69.589       | N/A          | N/A            | 160.475       | -2.810       |
| 3       | Sinusoidal Bias | -14.556       | 8.692        | 1.436          | 65.669        | 0.000        |
| 3       | Constant Bias   | -14.492       | N/A          | N/A            | 66.621        | -1.480       |
| 4       | Sinusoidal Bias | 42.007        | 47.468       | -1.161         | 176.735       | 0.000        |
| 4       | Constant Bias   | 42.793        | N/A          | N/A            | 190.810       | -23.854      |
| 5       | Sinusoidal Bias | -25.052       | 1.283        | 0.607          | 61.613        | 0.000        |
| 5       | Constant Bias   | -25.050       | N/A          | N/A            | 61.623        | 3.871        |
| 6       | Sinusoidal Bias | -54.271       | 15.12        | -0.481         | 65.382        | 0.000        |
| 6       | Constant Bias   | -54.346       | N/A          | N/A            | 67.457        | -11.753      |
| 7       | Sinusoidal Bias | 21.550        | 24.817       | -1.21          | 68.076        | 0.000        |
| 7       | Constant Bias   | 21.652        | N/A          | N/A            | 73.418        | -30.514      |
| 8       | Sinusoidal Bias | 12.830        | 14.322       | 1.012          | 95.736        | 0.000        |
| 8       | Constant Bias   | 12.836        | N/A          | N/A            | 97.677        | -3.968       |
| 9       | Sinusoidal Bias | 0.216         | 16.564       | -0.529         | 97.097        | 0.000        |
| 9       | Constant Bias   | 0.318         | N/A          | N/A            | 99.491        | -4.859       |
| 10      | Sinusoidal Bias | 3.735         | 15.64        | -0.956         | 127.027       | 0.000        |
| 10      | Constant Bias   | 3.783         | N/A          | N/A            | 129.383       | -1.729       |
| 11      | Sinusoidal Bias | 60.449        | 13.294       | -0.295         | 116.987       | 0.000        |
| 11      | Constant Bias   | 60.467        | N/A          | N/A            | 118.368       | -0.652       |
| 12      | Sinusoidal Bias | 7.974         | 16.892       | 0.394          | 117.834       | 0.000        |
| 12      | Constant Bias   | 8.233         | N/A          | N/A            | 119.763       | -3.079       |
| 13      | Sinusoidal Bias | -1.041        | 19.071       | -0.359         | 74.627        | 0.000        |
| 13      | Constant Bias   | -1.056        | N/A          | N/A            | 77.387        | -16.147      |
| 14      | Sinusoidal Bias | -27.310       | 17.567       | -0.847         | 151.860       | 0.000        |
| 14      | Constant Bias   | -27.203       | N/A          | N/A            | 154.390       | -0.969       |
| 15      | Sinusoidal Bias | -13.869       | 10.955       | -0.759         | 68.580        | 0.000        |
| 15      | Constant Bias   | -13.752       | N/A          | N/A            | 69.499        | -5.662       |
| 16      | Sinusoidal Bias | -4.454        | 48.497       | 1.085          | 122.325       | 0.000        |
| 16      | Constant Bias   | -4.918        | N/A          | N/A            | 141.447       | -56.525      |
| 17      | Sinusoidal Bias | 39.354        | 14.658       | 0.227          | 68.175        | 0.000        |
| 17      | Constant Bias   | 39.470        | N/A          | N/A            | 70.346        | -12.939      |

**Table 5.** Best fit parameters and AIC differences ( $\Delta AIC$ , sinusoidal - other model) for each model for all subjects.

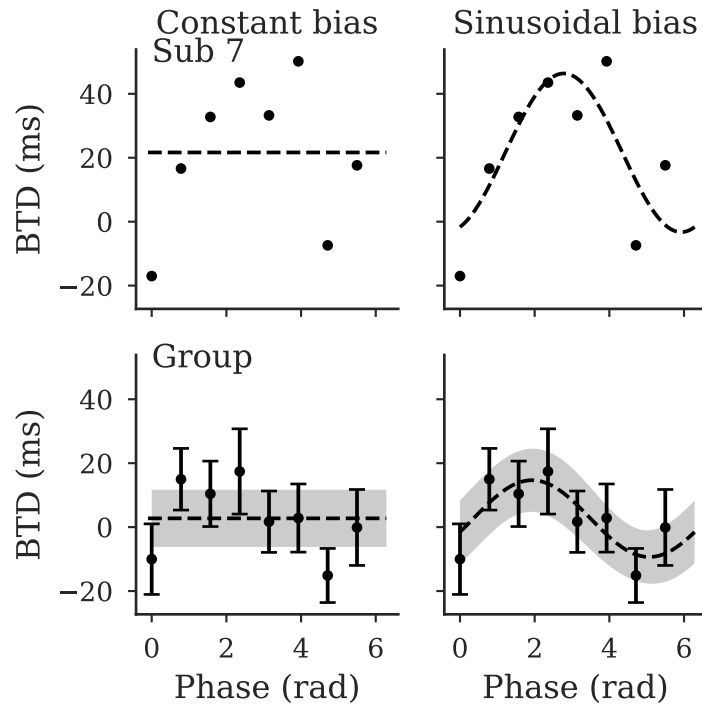

**Figure 7.** Sinusoidal and constant model predictions for an example subject and across subjects. For the group the dashed line indicates the mean predicted BT D across subjects, for the example subject it indicates the predicted BT D. The shaded regions indicates  $\pm 1$  SEM across subjects. Data points are the BT D obtained by fitting a psychometric curve to each phase. The error bars indicate  $\pm 1$  SEM across subjects.

446 In order to explore if our algorithm can facilitate model comparison, we plotted the average model  
447 probabilities across trials for both models and sampling methods used in our simulation experiment (see  
448 Figure 8). The model probabilities trend to 1 along the diagonal, indicating both adaptive and random  
449 sampling converge towards the correct model. As before, the probabilities are higher for the adaptive  
450 sampling method compared to random sampling suggesting that our algorithm increases the strength of  
451 evidence towards the correct model. The magnitude of this increase is lower than observed in simulation  
452 experiment 1.

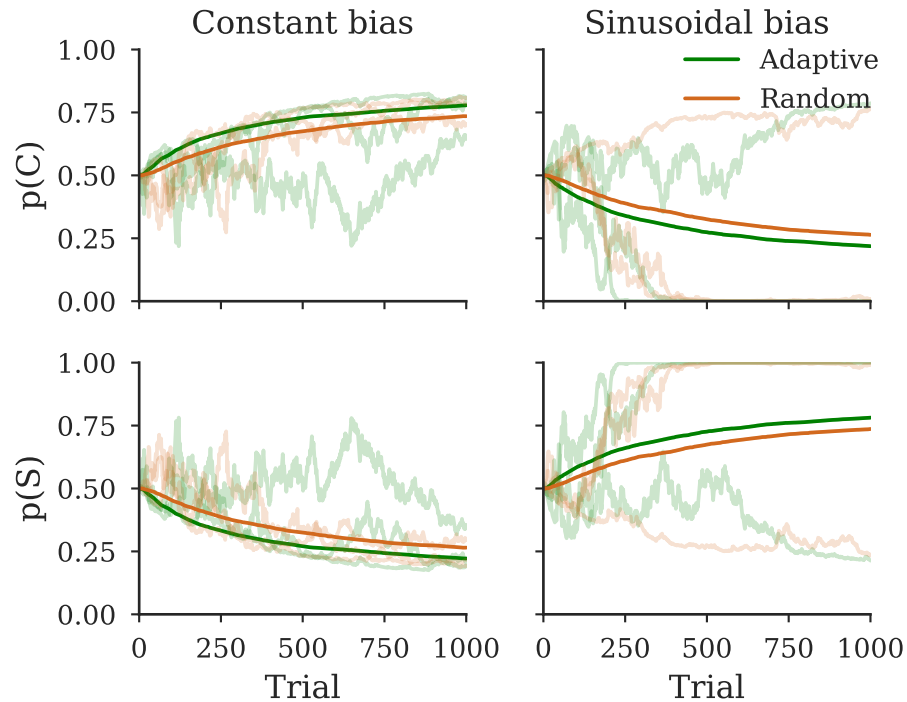

**Figure 8.** Evolution of model probabilities over trials for different generative models and algorithms. Columns indicate the model used to generate the data, rows indicate the probability of each model. The dark lines indicate the mean probability averaged over simulations, light lines indicate example simulations. Green coloring indicates stimuli were selected adaptively, orange coloring indicates stimuli were selected at random from the same stimulus grid.

453 We also quantified how each sampling method affects the conclusions drawn by computing the Bayes  
454 factor of the generative model against the other model. These Bayes factors are plotted in Figure 9.  
455 Interestingly, if stimuli are selected randomly and the correct model is sinusoidal we only conclude in  
456 favor of it in 60% of the simulations. This matches with the mixed results from the reanalysis. Adaptive  
457 sampling increases the proportion of simulations in which we find strong evidence in favor of the correct  
458 model. For the sinusoidal model, we obtained a benefit of about 15%, which is a smaller benefit than  
459 observed in the noise model simulation.

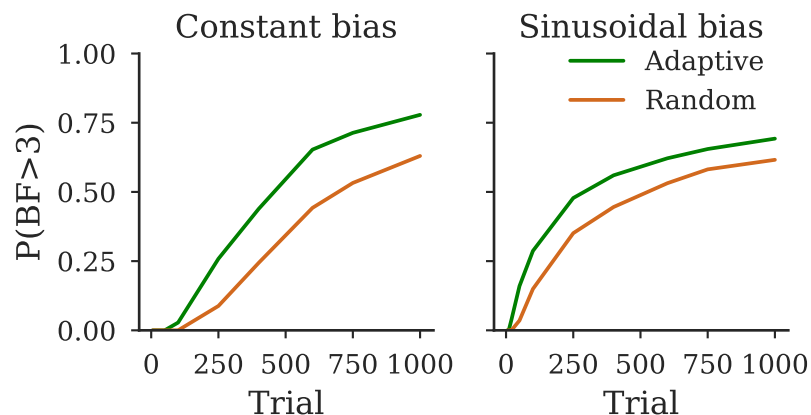

**Figure 9.** Proportion of simulations where the Bayes factors with respect to the generative model is over 3. Each column indicates the model used to generate the data.

460 In order to explore why the models cannot be strongly dissociated in each simulation, we plotted the  
461 probability of the correct model as a function of  $\sigma$  and  $\beta$  (see Figure 10). If the generative model is the  
462 constant bias model, both adaptive and random sampling method lead to model probabilities favoring the  
463 correct model but the adaptive method produces only slightly higher probabilities. Adaptive sampling  
464 leads to the probability of the correct model being slightly higher (indicated by a more yellow hue),  
465 which leads to a larger proportion of Bayes factors being over 3. By contrast, when the generative model  
466 is the sinusoidal model, the model probabilities range from strongly in favor of the sinusoidal model to  
467 strongly in favor of the constant model for both sampling methods. This is understandable because the  
468 smaller the amplitude of the sinusoid, the closer the sinusoidal model becomes to the constant model and  
469 thus penalizing for the additional parameters leads to favoring the simpler constant model. Interestingly,  
470 the shift in model probabilities from sinusoidal to constant is dependent on the variability of a subjects  
471 decisions; the smaller  $\sigma$  is, the lower  $\beta$  can be, while still inferring in favor of the sinusoidal model.

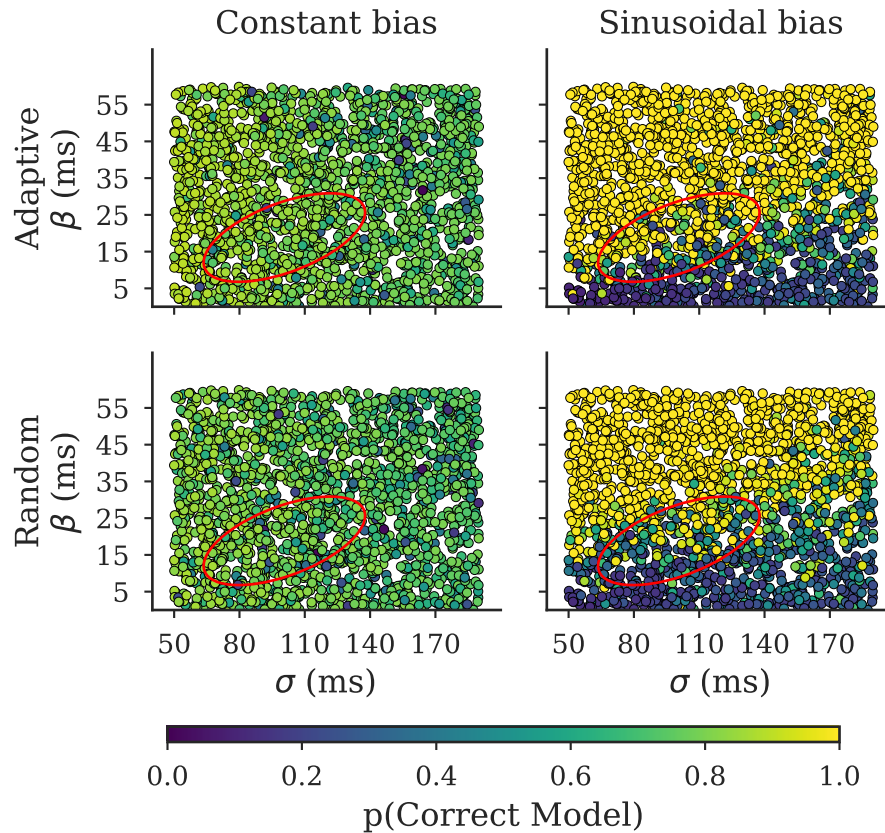

**Figure 10.** Probability of the generative model as a function of parameter values for different generative models and algorithms. Columns indicate the model used to generate the data, rows indicate the sampling method used to determine stimuli. Each point indicates the probability of the correct model as a function of amplitude  $\beta$  and standard deviation of a subject's choices  $\sigma$ . Note, constant bias model is independent of amplitude  $\beta$ , thus model probabilities do not change systematically as a function of  $\beta$ . The  $\beta$  value plotted refers to the value used in the sinusoidal model. The red ellipse indicates the mean  $\pm$  one standard deviation of the subject's parameters obtained from the sinusoidal model (see Table 5).

472 To determine why adaptive sampling improves the chance of inferring in favor of the correct gen-  
 473 erative model, Figure 11 illustrates the phase and SOA selected using the adaptive algorithm for an  
 474 example simulation. In the initial trials, the algorithm samples broadly over the phase and SOA, but  
 475 then converges to a few combinations of SOA and phase. Specifically, adaptive sampling selects the  
 476 phases where the BTD is maximal or minimal and SOA values close to the current  $\alpha$  estimate.

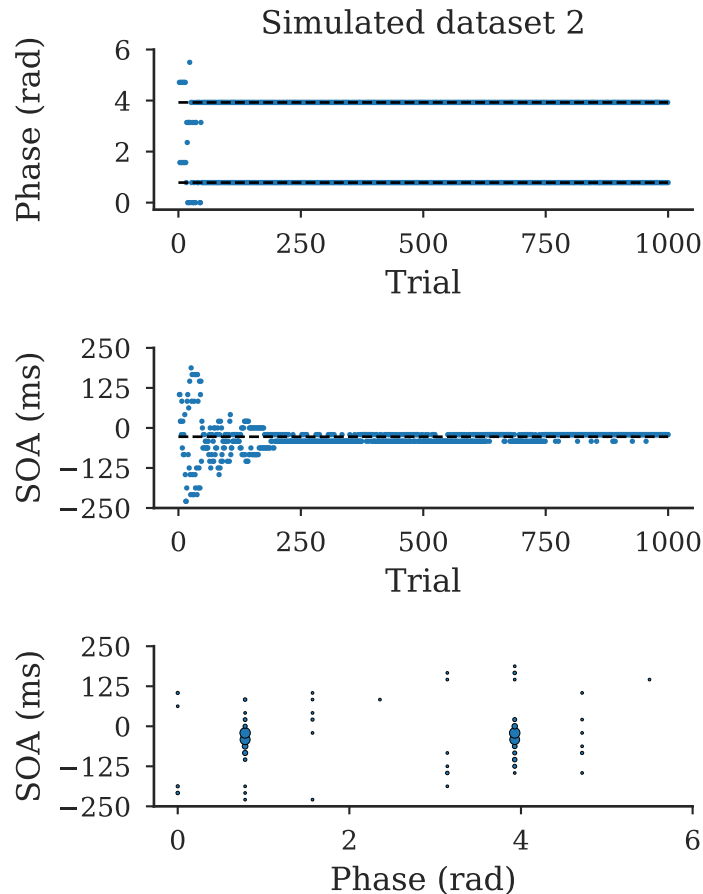

**Figure 11.** Stimuli selected adaptively for an example simulation. The upper two plots indicate the phase and SOA sampled across trials. In both plots the blue dots indicate the sampled stimuli for a particular trial. For the phase plot the dashed lines indicate the phases (from our stimulus set) for which the BTD is maximal or minimal. For the SOA plot the dashed line indicates the baseline BTD (the BTD independent of phase modulations). The lower plot indicates a scatter plot of the combination of phase and SOA. The radius of the data point is proportional to  $\sqrt{N}$  where  $N$  is the number of times this combination was selected.

## 477 Discussion

478 Using a series of simulations in which the correct generative model is known, we show that selecting  
479 stimuli adaptively increases the probability of inferring the correct generative model. We further show  
480 this increase affects the conclusions an experimenter could draw. When stimuli are selected adaptively  
481 an experimenter is more likely to conclude strongly in favor of the correct generative model and it  
482 requires fewer trials to reach this conclusion. For example, in Figure 2 when the generative model is the  
483 generalized model, our adaptive algorithm yields in only 250 trials strong evidence towards the correct

484 model in 60% of the simulations. By contrast almost none of the simulations using random sampling  
485 showed strong evidence.

486 We illustrate this model comparison benefit in two distinct settings, firstly, dissociating different  
487 sensory noise models and secondly, dissociating models of target selection. As an additional step towards  
488 practical application, we also used our algorithm to test between sensory noise models of human speed  
489 perception. We found that selecting stimuli adaptively increases the strength of evidence towards the  
490 model previously proposed (Stocker & Simoncelli, 2004, 2006).

491 Our findings match with previous work in cognitive science which illustrate that models of memory  
492 retention can be better dissociated by selecting stimuli adaptively (Cavagnaro et al., 2010, 2011). We  
493 also illustrate that the magnitude of improvement provided by adaptive sampling is highly specific to  
494 the models being compared. Specifically, we found a dramatic improvement in dissociating sensory noise  
495 models but only a small improvement in dissociating models of saccadic target selection.

496 Being able to compare models in an efficient manner encourages comparison of different models  
497 which may otherwise not be compared. For example, in many cases the sensory noise model is a  
498 single component of a more complex model (Acerbi et al., 2012, 2017; Jazayeri & Shadlen, 2010). In  
499 the aforementioned work, the possibility of different sensory noise models is dealt with through model  
500 comparison. However, incorporating multiple sensory noise models adds an additional degree of freedom,  
501 to the space of possible models, which can introduce difficulties in model comparison (Acerbi, Ma, &  
502 Vijayakumar, 2014). Specifically, multiple models with different components (for instance, sensory noise,  
503 priors, loss functions) can fit the same data equally well which makes inferring the correct components  
504 difficult (Acerbi et al., 2014). This study also indicated a possible solution to this problem; fixing  
505 certain model components and parameters based on previous work or additional experiments. As such  
506 an experimenter could perform an additional experiment to test the sensory noise model (and also  
507 obtain parameter estimates) for each subject, which could then be fixed in the model comparison. Our  
508 algorithm presents an efficient way to test between the noise models in a small number of trials and  
509 therefore could be used as a method for efficient model selection.

510 Although we illustrate, in two distinct practical examples, the benefits of using our algorithm, there  
511 are limitations to our approach. One major limitation is the grid-based approach we use in our algorithm.  
512 While this approach is reasonable for the relatively simple models we tested here. It is unfeasible for more  
513 complex models (models with either more parameters or more stimuli dimensions). This is because if we  
514 use the same sized grid for each parameter the number of points increases exponentially with the number



515 of parameter dimensions or stimuli dimensions (DiMattina, 2015). For more complex models, these grids  
516 could exceed the RAM memory available in certain computers, preventing our algorithm from being  
517 applicable. In addition, more complex models will require more time to compute the optimal stimulus.  
518 For example, it takes approximately 100 ms with our current models, the additional time increase  
519 may render the current implementation unfeasible for more complex models. Fortunately, there are  
520 a number of different approaches which can compensate for these problem. One method is to use an  
521 adaptive approach to selecting the number of grid points and their positions (Kim, Pitt, Lu, Steyvers, &  
522 Myung, 2014; Pflüger, Peherstorfer, & Bungartz, 2010). The notion is that the contribution of each point  
523 in the parameter space is not equal and thus more points should be used for more informative regions  
524 of the parameter space. This approach, previously suggested in the context of parameter estimation  
525 (DiMattina, 2015) could allow our algorithm to scale to higher dimensional models, or to more than three  
526 models. Another alternative solution is to use an analytic approximation to the parameter posterior,  
527 for example by using a Laplace approximation (DiMattina, 2015) or by a sum-of-Gaussians (DiMattina  
528 & Zhang, 2011) and compute the optimal stimuli based on the approximated posterior. With such an  
529 approximation it is only necessary to maintain the parameters for the approximation rather than large  
530 grids. Again allowing our algorithm to scale up to higher dimensions and more models. However, this  
531 comes at the computational cost of having to refit each of these approximations to every model on each  
532 trial. As the time required to evaluate the likelihood typically increases approximately linearly with  
533 the number of datapoints, this means the time required to refit these approximation increases with the  
534 duration of the experiment (DiMattina, 2015). Additionally, if the shapes of the posteriors are a poor  
535 match to these approximations (for example, highly skewed distributions are poorly approximated using  
536 a Laplace approximation) then this approach may perform poorly compared to grid approximations  
537 which present a non-parametric method of representing the posterior (DiMattina, 2015). Given that  
538 these different approaches have distinct costs and benefits, it is important to quantitatively test them  
539 to see how each performs in terms of accuracy, computation time and memory usage. A detailed  
540 comparison of this type has been performed in terms of adaptive stimulus selection for parameter  
541 estimation (DiMattina, 2015), but to our knowledge, no such analysis has been performed for model  
542 comparison. An important avenue for further work would be to explicitly compare our algorithm to  
543 other existing algorithms (DiMattina, 2016; Cavagnaro et al., 2010) to identify the relative costs and  
544 benefits of each approach.

545 In addition to the practical limitations of our approach, it is important to consider the theoretical

546 implications of using adaptive sampling on model comparison. For example, adaptive sampling could  
547 significantly change the distribution of stimuli presented to the subjects (see Figure 6) and therefore  
548 could violate assumptions used in certain model comparisons. For example, it is assumed the subject's  
549 underlying model is independent of the stimuli presented and typically Bayesian observer models assume  
550 that the subject's priors matches the stimulus distribution (Keshvari et al., 2012, 2013). The adaptive  
551 approach may cause violations of these assumptions. To illustrate this, consider the change detection  
552 experiments referenced above (Keshvari et al., 2012, 2013). In these experiments subjects are first shown  
553 a number of oriented ellipses which the subject has to memorize. Subsequently the ellipses are displayed  
554 again either with the same orientation or a changed orientation and the observer must report whether  
555 a change is perceived or not. All the models compared for this task assumed the subject used a circular  
556 uniform prior over the size of the change (the same used to generate the stimuli). If we were to generate  
557 the change magnitude adaptively instead, this could create a non-uniform distribution. Presenting a  
558 non-uniform distribution of change magnitude may cause subjects to alter their response strategy. For  
559 example, if a subject is only being presented trials with large changes he/she may shift from encoding  
560 the stimuli precisely to a more coarse encoding of the stimuli as precise encoding is no longer needed for  
561 the task. This biased distribution could also create a mismatch between the assumed (uniform circular)  
562 prior in the model and the actual experiment, which could cause biases in model comparison.

563 Although these issues may seem severe, the risk can be mitigated. Our suggestion is to not rely only  
564 on adaptive techniques as definitive evidence towards a model. It is important that multiple experiments  
565 and sampling methods support the same model. In some cases discrepancies may be found between  
566 sampling methods (e.g. in our noise model comparison experiment). In these cases it is important  
567 to perform simulations to see if these results are to be expected (see Supplemental material for the  
568 simulation we performed) or if the adaptive technique could be biasing the comparison.

569 A final theoretical point is that our algorithm assumes the true model used by the subject is part  
570 of the included set of models being considered (an assumption in all parametric model comparisons). If  
571 the true model is not part of this set then the stimuli are not optimized to find evidence for this model.  
572 Obviously, in real subjects, it is impossible to know what the 'true' model is, rather we are searching  
573 for realistic models that best explain the subject data. It is important to be aware that when using any  
574 adaptive approach the stimuli are only optimized for dissociating the assumed model set.

575 An additional area for further work is the importance of priors in dissociating models. For simplicity,  
576 we used uniform priors for both models and parameters. However, this neglects prior information which

577 may reduce the number of trials necessary to estimate which model is the best. How should we determine  
578 these priors? Within statistics itself there is little consensus on how this should be done, ranging from  
579 the prior being a subjective choice of the experimenter (de Finetti, 2017) to the prior being objectively  
580 estimated from data (Jaynes, 2003). Recent work has embraced the latter approach and used hierarchical  
581 Bayesian modeling to estimate the prior based on previous subjects (Kim et al., 2014). For example, this  
582 approach has been successful in determining parameter priors to use for observer’s contrast sensitivity  
583 functions, both in simulations and in actual experiments (Gu et al., 2016; Kim et al., 2014). A similar  
584 approach could be taken for estimating both parameter and model priors by creating a hierarchical  
585 model which incorporates the different models to be compared and fitting this to data from previous  
586 subjects. An important step for further work would be to formalize this generalization and investigate  
587 how these priors affect model inference.

## 588 Acknowledgments

589 This work was supported by the European Research Council grant EU-ERC-283567 (to WPM) and the  
590 Netherlands Organization of Scientific Research grants NWO-VICI: 453-11-001 (to WPM and JRHC)  
591 and NWO-VENI: 451-10-017 (to LPJS). We would like to thank the two anonymous reviewers for their  
592 helpful comments, including the change detection example.

## 593 Appendix A

594 In order to model a subject’s 2-afc behavior as a function of different sensory noise models we assume  
595 a subject receives two sensory measurements  $x_1$  and  $x_2$ , one for the reference and one for the probe.  
596 We model these as normally distributed random variables, with a mean centered on the true reference  
597 and probe values and a variance which is a function of the underlying sensory noise model. As such we  
598 can write  $x_1$  and  $x_2$  as  $x_1 \sim \mathcal{N}(s_1, \sigma_1^2(m))$ ,  $x_2 \sim \mathcal{N}(s_2, \sigma_2^2(m))$ . We assume an observer responds 1 if  
599  $x_2 > x_1$  and 0 otherwise. In order to derive the distribution of an observer’s response it is useful to note  
600 this is equivalent to  $x_2 - x_1 > 0$ . As  $x_2$  and  $x_1$  are normal distributed random variables, subtracting  
601 them produces another normally distributed variable  $\Delta_x$ . Therefore the subject’s response probability  
602 can be written as:

$$p(\Delta_x | s_1, s_2) = \mathcal{N}(s_2 - s_1, \sigma_2^2(m) + \sigma_1^2(m))$$

603 The likelihood of an observer responding 1 is obtained by integrating over positive values of  $\Delta_x$ ,

$$p(r = 1|s_1, s_2) = \int_0^{\infty} p(\Delta_x|s_1, s_2)d\Delta_x$$
$$p(r = 1|s_1, s_2) = \Phi(s_2 - s_1; 0, \sigma_2^2 + \sigma_1^2)$$

604 Because the responses are mutually exclusive, it follows that the likelihood of a subject responding 0 is,

$$p(r = 0|s_1, s_2) = 1 - p(r = 1|s_1, s_2, \theta)$$

605 in which  $\Phi$  is the cumulative normal distribution, evaluated at point  $s_2 - s_1$ , with a mean of 0 and  
606 variance  $\sigma_2^2 + \sigma_1^2$ . This entails that a subject's 2-afc behavior is unbiased and also that subjects do not  
607 lapse during the experiment. To make the model more realistic, we augment it with a small bias term  
608  $\alpha$  to account for small deviations from unbiased behavior and a lapse term  $\lambda$  to account for lapses in  
609 the task. Therefore the final response probability can be written,

$$p(r = 1|s_1, s_2) = \lambda + (1 - 2\lambda)\Phi(s_2 - s_1; \alpha, \sigma_2^2 + \sigma_1^2)$$

610 It is important to note that subjects do not estimate the underlying speed (using Bayes rule) as they  
611 are using sensory observations rather than posterior estimates. This was done for two reasons. Firstly,  
612 there is not a consensus on how additional information is incorporated in speed perception; some models  
613 propose that observers incorporate assumptions about motion dynamics to create priors (Kwon, Tadin,  
614 & Knill, 2015), others propose statistics of natural stimuli are used to form priors (Stocker & Simoncelli,  
615 2004, 2006). Secondly, unless a uniform prior (across the real line) or conjugate prior is used, computing  
616 the response probability in closed form is difficult (recent work has analytically derived the effect of  
617 Gaussian priors in 2-afc tasks (Acuna, Berniker, Fernandes, & Kording, 2015)).

618 Because our main focus is the sensory noise model, not the incorporation of priors, our experiment  
619 was designed such that the influence of priors should be negligible and hence our derived response  
620 probability should be a reasonable approximation. Specifically, it has been shown that the bias in speed  
621 estimation decreases when stimuli are close to fixation (Kwon et al., 2015) and biases decrease when  
622 contrast is high (Stocker & Simoncelli, 2004, 2006). Our stimuli were centered relatively close to fixation  
623 (6 deg eccentricity) compared to other speed perception experiments (Kwon et al., 2015) and also had  
624 a much higher contrast than is typical (Stocker & Simoncelli, 2004, 2006). This means most of subject

625 behavior should be governed by the sensory noise and not the prior.

## 626 References

- 627 Acerbi, L., Dokka, K., Angelaki, D. E., & Ma, W. J. (2017, June). Bayesian Comparison of Explicit  
628 and Implicit Causal Inference Strategies in Multisensory Heading Perception. *bioRxiv*, 150052.  
629 doi: 10.1101/150052
- 630 Acerbi, L., Ma, W. J., & Vijayakumar, S. (2014). A Framework for Testing Identifiability of Bayesian  
631 Models of Perception. In *Advances in Neural Information Processing Systems* (pp. 1026–1034).
- 632 Acerbi, L., Wolpert, D. M., & Vijayakumar, S. (2012). Internal Representations of Temporal Statistics  
633 and Feedback Calibrate Motor-Sensory Interval Timing. *PLoS Computational Biology*, 8(11),  
634 e1002771. doi: 10.1371/journal.pcbi.1002771
- 635 Acuna, D. E., Berniker, M., Fernandes, H. L., & Kording, K. P. (2015). Using psychophysics to ask if  
636 the brain samples or maximizes. *Journal of Vision*, 15(3), 7–7. doi: 10.1167/15.3.7
- 637 Akaike, H. (1974). A new look at the statistical model identification. *IEEE Transactions on Automatic*  
638 *Control*, 19(6), 716–723. doi: 10.1109/TAC.1974.1100705
- 639 Bakker, R. S., Weijer, R. H. A., van Beers, R. J. v., Selen, L. P. J., & Medendorp, W. P. (2017).  
640 Decisions in motion: passive body acceleration modulates hand choice. *Journal of Neurophysiology*,  
641 jn.00022.2017. doi: 10.1152/jn.00022.2017
- 642 Battaglia, P. W., Kersten, D., & Schrater, P. R. (2011). How Haptic Size Sensations Improve Distance  
643 Perception. *PLOS Computational Biology*, 7(6), e1002080. doi: 10.1371/journal.pcbi.1002080
- 644 Burnham, K. P., Anderson, D. R., & Burnham, K. P. (2002). *Model selection and multimodel inference:*  
645 *a practical information-theoretic approach* (2nd ed ed.). New York: Springer.
- 646 Byrd, R., Lu, P., Nocedal, J., & Zhu, C. (1995). A Limited Memory Algorithm for Bound Constrained  
647 Optimization. *SIAM Journal on Scientific Computing*, 16(5), 1190–1208. Retrieved 2017-04-20,  
648 from <http://epubs.siam.org/doi/10.1137/0916069> doi: 10.1137/0916069
- 649 Cavagnaro, D. R., Gonzalez, R., Myung, J. I., & Pitt, M. A. (2013, February). Optimal Decision Stimuli  
650 for Risky Choice Experiments: An Adaptive Approach. *Management Science*, 59(2), 358–375.  
651 doi: 10.1287/mnsc.1120.1558
- 652 Cavagnaro, D. R., Myung, J. I., Pitt, M. A., & Kujala, J. V. (2010). Adaptive design optimiza-  
653 tion: A mutual information-based approach to model discrimination in cognitive science. *Neural*  
654 *computation*, 22(4), 887–905.
- 655 Cavagnaro, D. R., Pitt, M. A., & Myung, J. I. (2011). Model discrimination through adaptive experi-  
656 mentation. *Psychonomic Bulletin & Review*, 18(1), 204–210. doi: 10.3758/s13423-010-0030-4

- 657 de Finetti, B. (2017). *Theory of Probability: A Critical Introductory Treatment*. John Wiley & Sons.
- 658 DiMattina, C. (2015). Fast adaptive estimation of multidimensional psychometric functions. *Journal*  
659 *of Vision*, 15(9), 5. doi: 10.1167/15.9.5
- 660 DiMattina, C. (2016). Comparing models of contrast gain using psychophysical experiments. *Journal*  
661 *of Vision*, 16(9), 1. doi: 10.1167/16.9.1
- 662 DiMattina, C., & Zhang, K. (2011). Active data collection for efficient estimation and comparison of  
663 nonlinear neural models. *Neural computation*, 23(9), 2242–2288.
- 664 DiMattina, C., & Zhang, K. (2013). Adaptive stimulus optimization for sensory systems neuroscience.  
665 *Frontiers in Neural Circuits*, 7. doi: 10.3389/fncir.2013.00101
- 666 Fründ, I., Haenel, N. V., & Wichmann, F. A. (2011, May). Inference for psychometric functions in the  
667 presence of nonstationary behavior. *Journal of Vision*, 11(6), 16–16. doi: 10.1167/11.6.16
- 668 Gardner, J., Malkomes, G., Garnett, R., Weinberger, K. Q., Barbour, D., & Cunningham, J. P. (2015).  
669 Bayesian Active Model Selection with an Application to Automated Audiometry. In *Advances in*  
670 *Neural Information Processing Systems* (pp. 2377–2385).
- 671 Gu, H., Kim, W., Hou, F., Lesmes, L. A., Pitt, M. A., Lu, Z.-L., & Myung, J. I. (2016). A hierarchical  
672 Bayesian approach to adaptive vision testing: A case study with the contrast sensitivity function.  
673 *Journal of Vision*, 16(6). doi: 10.1167/16.6.15
- 674 Houthby, N., Huszár, F., Ghahramani, Z., & Lengyel, M. (2011). Bayesian Active Learning for Classifi-  
675 cation and Preference Learning. *arXiv:1112.5745 [cs, stat]*. (arXiv: 1112.5745)
- 676 Hunter, J. D. (2007, May). Matplotlib: A 2d Graphics Environment. *Computing in Science Engineering*,  
677 9(3), 90–95. doi: 10.1109/MCSE.2007.55
- 678 Jaynes, E. T. (2003). *Probability theory: the logic of science*. Cambridge university press.
- 679 Jazayeri, M., & Shadlen, M. N. (2010). Temporal context calibrates interval timing. *Nature Neuro-*  
680 *science*, 13(8), 1020–1026. doi: 10.1038/nn.2590
- 681 Jones, E., Oliphant, T., Peterson, P., & others. (2001). *SciPy: Open source scientific tools for Python*.  
682 Retrieved from <http://www.scipy.org/>
- 683 Kass, R. E., & Raftery, A. E. (1995). Bayes Factors. *Journal of the American Statistical Association*,  
684 90(430), 773–795. doi: 10.1080/01621459.1995.10476572
- 685 Keshvari, S., van den Berg, R., & Ma, W. J. (2012). Probabilistic Computation in Human Per-  
686 ception under Variability in Encoding Precision. *PLoS ONE*, 7(6), e40216. doi: 10.1371/jour-  
687 nal.pone.0040216

- 688 Keshvari, S., van den Berg, R., & Ma, W. J. (2013). No evidence for an item limit in change detection.  
689 *PLoS computational biology*, *9*(2), e1002927.
- 690 Kim, W., Pitt, M. A., Lu, Z.-L., Steyvers, M., & Myung, J. I. (2014). A Hierarchical Adaptive Approach  
691 to Optimal Experimental Design. *Neural Computation*, *26*(11), 2465–2492.
- 692 Kontsevich, L. L., & Tyler, C. W. (1999). Bayesian adaptive estimation of psychometric slope and  
693 threshold. *Vision Research*, *39*(16), 2729–2737. doi: 10.1016/S0042-6989(98)00285-5
- 694 Kording, K. P., Beierholm, U., Ma, W. J., Quartz, S., Tenenbaum, J. B., & Shams, L. (2007). Causal  
695 Inference in Multisensory Perception. *PLOS ONE*, *2*(9), e943. doi: 10.1371/journal.pone.0000943
- 696 Kujala, J. V., & Lukka, T. J. (2006). Bayesian adaptive estimation: The next dimension. *Journal of*  
697 *Mathematical Psychology*, *50*(4), 369–389. doi: 10.1016/j.jmp.2005.12.005
- 698 Kulick, J., Lieck, R., & Toussaint, M. (2014). Active learning of hyperparameters: An expected cross  
699 entropy criterion for active model selection. *ArXiv e-prints*.
- 700 Kwon, O.-S., Tadin, D., & Knill, D. C. (2015). Unifying account of visual motion and posi-  
701 tion perception. *Proceedings of the National Academy of Sciences*, *112*(26), 8142–8147. doi:  
702 10.1073/pnas.1500361112
- 703 Lesmes, L. A., Lu, Z.-L., Baek, J., & Albright, T. D. (2010). Bayesian adaptive estimation of the  
704 contrast sensitivity function: The quick CSF method. *Journal of Vision*, *10*(3), 17–17. doi:  
705 10.1167/10.3.17
- 706 MacKay, D. J. (2003). *Information theory, inference and learning algorithms*. Cambridge university  
707 press.
- 708 McKee, S. P., Silverman, G. H., & Nakayama, K. (1986). Precise velocity discrimination despite random  
709 variations in temporal frequency and contrast. *Vision Research*, *26*(4), 609–619.
- 710 McKinney, W., & others. (2010). Data structures for statistical computing in python. In *Proceedings*  
711 *of the 9th Python in Science Conference* (Vol. 445, pp. 51–56). SciPy Austin, TX.
- 712 Odegaard, B., Wozny, D. R., & Shams, L. (2015). Biases in Visual, Auditory, and Audiovisual Perception  
713 of Space. *PLOS Computational Biology*, *11*(12), e1004649. doi: 10.1371/journal.pcbi.1004649
- 714 Pedregosa, F., Varoquaux, G., Gramfort, A., Michel, V., Thirion, B., Grisel, O., ... others (2011).  
715 Scikit-learn: Machine learning in Python. *Journal of Machine Learning Research*, *12*(Oct), 2825–  
716 2830.
- 717 Peirce, J. W. (2009). Generating stimuli for neuroscience using PsychoPy. *Frontiers in Neuroinformat-*  
718 *ics*, *2*. doi: 10.3389/neuro.11.010.2008



- 719 Petzschner, F. H., & Glasauer, S. (2011). Iterative Bayesian Estimation as an Explanation for Range  
720 and Regression Effects: A Study on Human Path Integration. *Journal of Neuroscience*, *31*(47),  
721 17220–17229. doi: 10.1523/JNEUROSCI.2028-11.2011
- 722 Pflüger, D., Peherstorfer, B., & Bungartz, H.-J. (2010). Spatially adaptive sparse grids  
723 for high-dimensional data-driven problems. *Journal of Complexity*, *26*(5), 508–522. doi:  
724 10.1016/j.jco.2010.04.001
- 725 Pillow, J. W., & Park, M. (2016). Adaptive Bayesian methods for closed-loop neurophysiology. In  
726 *Closed Loop Neuroscience* (pp. 3–18). Elsevier.
- 727 Prins, N. (2013). The psi-marginal adaptive method: How to give nuisance parameters the attention  
728 they deserve (no more, no less). *Journal of Vision*, *13*(7), 3–3. doi: 10.1167/13.7.3
- 729 Rincon-Gonzalez, L., Selen, L. P. J., Halfwerk, K., Koppen, M., Corneil, B. D., & Medendorp, W. P.  
730 (2016). Decisions in motion: vestibular contributions to saccadic target selection. *Journal of*  
731 *Neurophysiology*, *116*(3), 977–985. doi: 10.1152/jn.01071.2015
- 732 Sanborn, A. N., & Beierholm, U. R. (2016). Fast and Accurate Learning When Making Discrete Numeri-  
733 cal Estimates. *PLOS Computational Biology*, *12*(4), e1004859. doi: 10.1371/journal.pcbi.1004859
- 734 Stocker, A. A., & Simoncelli, E. P. (2004). Constraining a Bayesian Model of Human Visual Speed  
735 Perception. In *NIPS* (pp. 1361–1368).
- 736 Stocker, A. A., & Simoncelli, E. P. (2006). Noise characteristics and prior expectations in human visual  
737 speed perception. *Nature Neuroscience*, *9*(4), 578–585. doi: 10.1038/nn1669
- 738 Walt, S. v. d., Colbert, S. C., & Varoquaux, G. (2011, March). The NumPy Array: A Structure  
739 for Efficient Numerical Computation. *Computing in Science Engineering*, *13*(2), 22–30. doi:  
740 10.1109/MCSE.2011.37
- 741 Wang, Z., & Simoncelli, E. P. (2008). Maximum differentiation (MAD) competition: A methodology  
742 for comparing computational models of perceptual quantities. *Journal of Vision*, *8*(12), 8–8.
- 743 Weiss, Y., Simoncelli, E. P., & Adelson, E. H. (2002). Motion illusions as optimal percepts. *Nature*  
744 *Neuroscience*, *5*(6), 598–604. doi: 10.1038/nn0602-858
